# Supplementary material
Source: MDPI journal article supplement (https://www.mdpi.com/2304-6740/4/4/40)

# checkCIF/PLATON report

Structure factors have been supplied for datablock(s) sad

THIS REPORT IS FOR GUIDANCE ONLY. IF USED AS PART OF A REVIEW PROCEDURE FOR PUBLICATION, IT SHOULD NOT REPLACE THE EXPERTISE OF AN EXPERIENCED CRYSTALLOGRAPHIC REFEREE.

No syntax errors found.      CIF dictionary      Interpreting this report

## Datablock: sad

---

|                 |                     |                                     |
|-----------------|---------------------|-------------------------------------|
| Bond precision: | C-C = 0.0023 A      | Wavelength=0.71073                  |
| Cell:           | a=9.2087(4)         | b=10.5543(4)      c=12.6990(5)      |
|                 | alpha=71.752(1)     | beta=70.245(1)      gamma=73.105(1) |
| Temperature:    | 100 K               |                                     |
|                 | Calculated          | Reported                            |
| Volume          | 1079.35(8)          | 1079.35(8)                          |
| Space group     | P -1                | P -1                                |
| Hall group      | -P 1                | -P 1                                |
| Moiety formula  | C22 H26 N O2 P S Si | C22 H26 N O2 P S Si                 |
| Sum formula     | C22 H26 N O2 P S Si | C22 H26 N O2 P S Si                 |
| Mr              | 427.56              | 427.56                              |
| Dx,g cm-3       | 1.316               | 1.316                               |
| Z               | 2                   | 2                                   |
| Mu (mm-1)       | 0.298               | 0.298                               |
| F000            | 452.0               | 452.0                               |
| F000'           | 452.76              |                                     |
| h,k,lmax        | 10,12,15            | 10,12,15                            |
| Nref            | 3796                | 3796                                |
| Tmin,Tmax       | 0.898,0.917         | 0.682,0.746                         |
| Tmin'           | 0.888               |                                     |

Correction method= # Reported T Limits: Tmin=0.682 Tmax=0.746  
AbsCorr = EMPIRICAL

Data completeness= 1.000      Theta(max)= 25.000

R(reflections)= 0.0290( 3473)      wR2(reflections)= 0.1189( 3796)

S = 1.049      Npar= 264

---

The following ALERTS were generated. Each ALERT has the format  
**test-name\_ALERT\_alert-type\_alert-level.**  
Click on the hyperlinks for more details of the test.

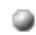

### Alert level G

---

|                   |                                                  |              |
|-------------------|--------------------------------------------------|--------------|
| PLAT154_ALERT_1_G | The s.u.'s on the Cell Angles are Equal ..(Note) | 0.001 Degree |
| PLAT909_ALERT_3_G | Percentage of Observed Data at Theta(Max) Still  | 86 %         |
| PLAT978_ALERT_2_G | Number C-C Bonds with Positive Residual Density  | 11 Note      |

---

0 **ALERT level A** = Most likely a serious problem - resolve or explain  
0 **ALERT level B** = A potentially serious problem, consider carefully  
0 **ALERT level C** = Check. Ensure it is not caused by an omission or oversight  
3 **ALERT level G** = General information/check it is not something unexpected

1 ALERT type 1 CIF construction/syntax error, inconsistent or missing data  
1 ALERT type 2 Indicator that the structure model may be wrong or deficient  
1 ALERT type 3 Indicator that the structure quality may be low  
0 ALERT type 4 Improvement, methodology, query or suggestion  
0 ALERT type 5 Informative message, check

---

It is advisable to attempt to resolve as many as possible of the alerts in all categories. Often the minor alerts point to easily fixed oversights, errors and omissions in your CIF or refinement strategy, so attention to these fine details can be worthwhile. In order to resolve some of the more serious problems it may be necessary to carry out additional measurements or structure refinements. However, the purpose of your study may justify the reported deviations and the more serious of these should normally be commented upon in the discussion or experimental section of a paper or in the "special\_details" fields of the CIF. checkCIF was carefully designed to identify outliers and unusual parameters, but every test has its limitations and alerts that are not important in a particular case may appear. Conversely, the absence of alerts does not guarantee there are no aspects of the results needing attention. It is up to the individual to critically assess their own results and, if necessary, seek expert advice.

### Publication of your CIF in IUCr journals

A basic structural check has been run on your CIF. These basic checks will be run on all CIFs submitted for publication in IUCr journals (*Acta Crystallographica*, *Journal of Applied Crystallography*, *Journal of Synchrotron Radiation*); however, if you intend to submit to *Acta Crystallographica Section C* or *E* or *IUCrData*, you should make sure that full publication checks are run on the final version of your CIF prior to submission.

### Publication of your CIF in other journals

Please refer to the *Notes for Authors* of the relevant journal for any special instructions relating to CIF submission.

---

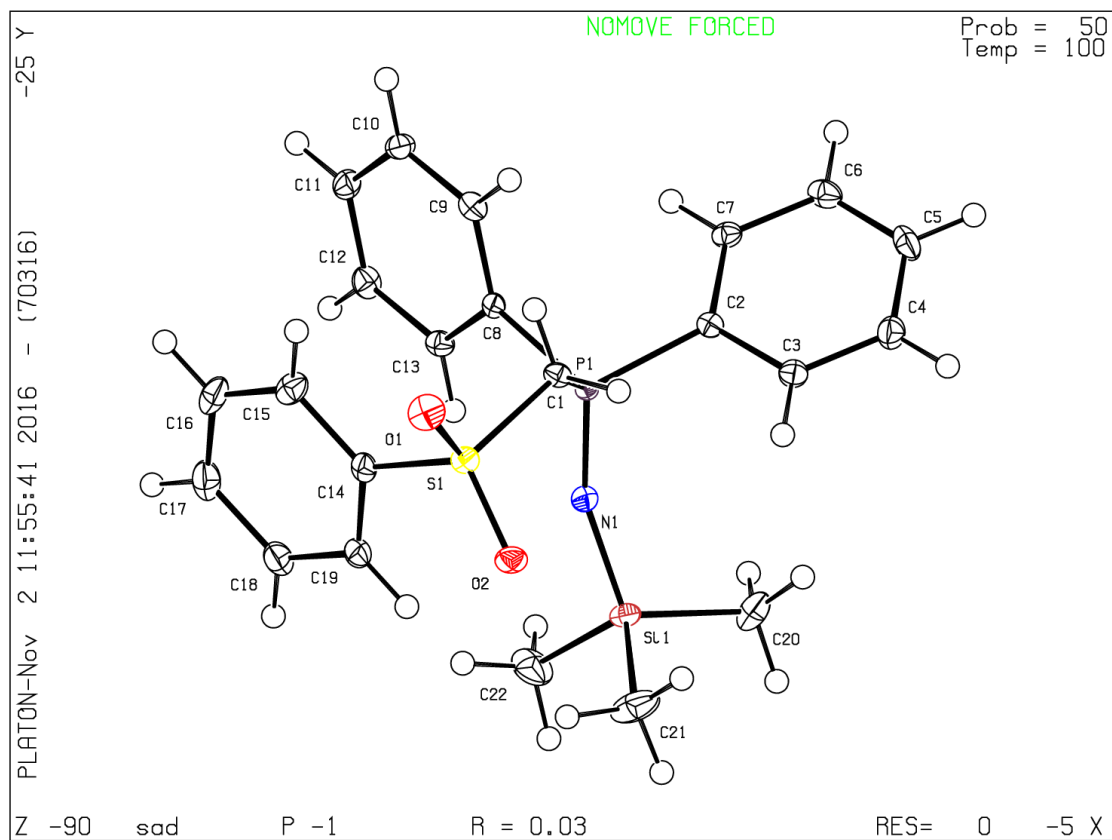

# checkCIF/PLATON report

Structure factors have been supplied for datablock(s) sad2

THIS REPORT IS FOR GUIDANCE ONLY. IF USED AS PART OF A REVIEW PROCEDURE FOR PUBLICATION, IT SHOULD NOT REPLACE THE EXPERTISE OF AN EXPERIENCED CRYSTALLOGRAPHIC REFEREE.

No syntax errors found.      CIF dictionary      Interpreting this report

## Datablock: sad2

---

|                 |                                                            |                                                     |
|-----------------|------------------------------------------------------------|-----------------------------------------------------|
| Bond precision: | C-C = 0.0055 A                                             | Wavelength=0.71073                                  |
| Cell:           | a=25.265(3)                                                | b=18.972(2)      c=24.452(3)                        |
|                 | alpha=90                                                   | beta=116.547(3)      gamma=90                       |
| Temperature:    | 100 K                                                      |                                                     |
|                 | Calculated                                                 | Reported                                            |
| Volume          | 10485(2)                                                   | 10485(2)                                            |
| Space group     | P 21/c                                                     | P 21/c                                              |
| Hall group      | -P 2ybc                                                    | -P 2ybc                                             |
| Moiety formula  | 4(C92 H106 Li8 N4 O9 P4 S4 Si4), 4(C4 H10 O), O2, 4(C2 H5) | C92 H106 Li8 N4 O9 P4 S4 Si4, C4 H10 O, O0.25 C2 H5 |
| Sum formula     | C392 H484 Li32 N16 O42 P16 S16 Si16                        | C98 H121 Li8 N4 O10.50 P4 S4 Si4                    |
| Mr              | 7771.98                                                    | 1942.98                                             |
| Dx, g cm-3      | 1.231                                                      | 1.231                                               |
| Z               | 1                                                          | 4                                                   |
| Mu (mm-1)       | 0.254                                                      | 0.254                                               |
| F000            | 4100.0                                                     | 4100.0                                              |
| F000'           | 4106.25                                                    |                                                     |
| h,k,lmax        | 30,22,29                                                   | 30,22,29                                            |
| Nref            | 18469                                                      | 18468                                               |
| Tmin,Tmax       | 0.982,0.985                                                | 0.696,0.745                                         |
| Tmin'           | 0.963                                                      |                                                     |

Correction method= # Reported T Limits: Tmin=0.696 Tmax=0.745  
AbsCorr = EMPIRICAL

Data completeness= 1.000      Theta(max)= 24.997

R(reflections)= 0.0494( 11964)      wR2(reflections)= 0.1144( 18468)

S = 1.012      Npar= 1254

The following ALERTS were generated. Each ALERT has the format

**test-name\_ALERT\_alert-type\_alert-level.**

Click on the hyperlinks for more details of the test.

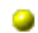

### Alert level C

|                   |                                                 |           |                                 |         |        |
|-------------------|-------------------------------------------------|-----------|---------------------------------|---------|--------|
| PLAT220_ALERT_2_C | Non-Solvent Resd 1                              | C         | Ueq(max)/Ueq(min) Range         | 5.0     | Ratio  |
| PLAT222_ALERT_3_C | Non-Solvent Resd 1                              | H         | Uiso(max)/Uiso(min) Range       | 4.6     | Ratio  |
| PLAT241_ALERT_2_C | High                                            | 'MainMol' | Ueq as Compared to Neighbors of | C91     | Check  |
| PLAT242_ALERT_2_C | Low                                             | 'MainMol' | Ueq as Compared to Neighbors of | Si2     | Check  |
| PLAT242_ALERT_2_C | Low                                             | 'MainMol' | Ueq as Compared to Neighbors of | O9      | Check  |
| PLAT340_ALERT_3_C | Low Bond Precision on                           | C-C Bonds | .....                           | 0.00548 | Ang.   |
| PLAT905_ALERT_3_C | Negative K value in the Analysis of Variance    | ...       |                                 | -1.293  | Report |
| PLAT977_ALERT_2_C | Check the Negative Difference Density on        | H91A      |                                 | -0.34   | eA-3   |
| PLAT978_ALERT_2_C | Number C-C Bonds with Positive Residual Density |           |                                 | 0       | Note   |

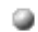

### Alert level G

FORMU01\_ALERT\_1\_G There is a discrepancy between the atom counts in the  
\_chemical\_formula\_sum and \_chemical\_formula\_moiety. This is  
usually due to the moiety formula being in the wrong format.

Atom count from \_chemical\_formula\_sum: C98 H121 Li8 N4 O10.5 P4 S4

Atom count from \_chemical\_formula\_moiety:C98 H121 Li8 N4 O10.25 P4 S

|                   |                                                  |       |              |
|-------------------|--------------------------------------------------|-------|--------------|
| PLAT042_ALERT_1_G | Calc. and Reported MoietyFormula Strings Differ  |       | Please Check |
| PLAT045_ALERT_1_G | Calculated and Reported Z Differ by a Factor ... | 0.25  | Check        |
| PLAT083_ALERT_2_G | SHELXL Second Parameter in WGHT Unusually Large  | 9.76  | Why ?        |
| PLAT230_ALERT_2_G | Hirshfeld Test Diff for C91 -- C92B ..           | 6.9   | s.u.         |
| PLAT300_ALERT_4_G | Atom Site Occupancy of <O1A_1 is Constrained at  | 0.25  | Check        |
| PLAT300_ALERT_4_G | Atom Site Occupancy of <O1B_1 is Constrained at  | 0.25  | Check        |
| PLAT300_ALERT_4_G | Atom Site Occupancy of *C1A_1 is Constrained at  | 0.5   | Check        |
| PLAT300_ALERT_4_G | Atom Site Occupancy of *C2A_1 is Constrained at  | 0.5   | Check        |
| PLAT300_ALERT_4_G | Atom Site Occupancy of *H1AA_1 is Constrained at | 0.5   | Check        |
| PLAT300_ALERT_4_G | Atom Site Occupancy of *H1AB_1 is Constrained at | 0.5   | Check        |
| PLAT300_ALERT_4_G | Atom Site Occupancy of *H1AC_1 is Constrained at | 0.5   | Check        |
| PLAT300_ALERT_4_G | Atom Site Occupancy of *H2A_1 is Constrained at  | 0.5   | Check        |
| PLAT300_ALERT_4_G | Atom Site Occupancy of *H2B_1 is Constrained at  | 0.5   | Check        |
| PLAT300_ALERT_4_G | Atom Site Occupancy of *C2B_1 is Constrained at  | 0.5   | Check        |
| PLAT300_ALERT_4_G | Atom Site Occupancy of *C1B_1 is Constrained at  | 0.5   | Check        |
| PLAT300_ALERT_4_G | Atom Site Occupancy of *H2C_1 is Constrained at  | 0.5   | Check        |
| PLAT300_ALERT_4_G | Atom Site Occupancy of *H2D_1 is Constrained at  | 0.5   | Check        |
| PLAT300_ALERT_4_G | Atom Site Occupancy of *H1BA_1 is Constrained at | 0.5   | Check        |
| PLAT300_ALERT_4_G | Atom Site Occupancy of *H1BB_1 is Constrained at | 0.5   | Check        |
| PLAT300_ALERT_4_G | Atom Site Occupancy of *H1BC_1 is Constrained at | 0.5   | Check        |
| PLAT301_ALERT_3_G | Main Residue Disorder ..... Percentage =         | 1     | Note         |
| PLAT302_ALERT_4_G | Anion/Solvent Disorder ..... Percentage =        | 33    | Note         |
| PLAT304_ALERT_4_G | Non-Integer Number of Atoms ( 0.50) in Resd. #   | 3     | Check        |
| PLAT304_ALERT_4_G | Non-Integer Number of Atoms ( 3.50) in Resd. #   | 4     | Check        |
| PLAT304_ALERT_4_G | Non-Integer Number of Atoms ( 3.50) in Resd. #   | 5     | Check        |
| PLAT311_ALERT_2_G | Isolated Disordered Oxygen Atom (No H's ?) ..... | O1A_1 | Check        |
| PLAT311_ALERT_2_G | Isolated Disordered Oxygen Atom (No H's ?) ..... | O1B_1 | Check        |
| PLAT343_ALERT_2_G | Unusual Angle Range in Main Residue for          | C1    | Check        |
| PLAT343_ALERT_2_G | Unusual Angle Range in Main Residue for          | C23   | Check        |
| PLAT343_ALERT_2_G | Unusual Angle Range in Main Residue for          | C45   | Check        |
| PLAT343_ALERT_2_G | Unusual Angle Range in Main Residue for          | C67   | Check        |
| PLAT720_ALERT_4_G | Number of Unusual/Non-Standard Labels .....      | 16    | Note         |
| PLAT764_ALERT_4_G | Overcomplete CIF Bond List Detected (Rep/Expd) . | 1.16  | Ratio        |
| PLAT779_ALERT_4_G | Suspect or Irrelevant (Bond) Angle in CIF .... # | 12    | Check        |
|                   | O2 -S1 -LI3 1.555 1.555 1.555                    | 41.67 | Deg.         |
| PLAT779_ALERT_4_G | Suspect or Irrelevant (Bond) Angle in CIF .... # | 18    | Check        |
|                   | C1 -S1 -LI2 1.555 1.555 1.555                    | 44.46 | Deg.         |

|                   |                                                 |        |       |       |
|-------------------|-------------------------------------------------|--------|-------|-------|
| PLAT779_ALERT_4_G | Suspect or Irrelevant (Bond) Angle in CIF       | .... # | 28    | Check |
| N1 -P1 -LI3       | 1.555 1.555 1.555                               |        | 43.23 | Deg.  |
| PLAT779_ALERT_4_G | Suspect or Irrelevant (Bond) Angle in CIF       | .... # | 33    | Check |
| C1 -P1 -LI2       | 1.555 1.555 1.555                               |        | 44.51 | Deg.  |
| PLAT779_ALERT_4_G | Suspect or Irrelevant (Bond) Angle in CIF       | .... # | 43    | Check |
| N1 -SI1 -LI3      | 1.555 1.555 1.555                               |        | 33.52 | Deg.  |
| PLAT779_ALERT_4_G | Suspect or Irrelevant (Bond) Angle in CIF       | .... # | 113   | Check |
| N2 -P2 -LI5       | 1.555 1.555 1.555                               |        | 42.49 | Deg.  |
| PLAT779_ALERT_4_G | Suspect or Irrelevant (Bond) Angle in CIF       | .... # | 128   | Check |
| N2 -SI2 -LI5      | 1.555 1.555 1.555                               |        | 34.99 | Deg.  |
| PLAT779_ALERT_4_G | Suspect or Irrelevant (Bond) Angle in CIF       | .... # | 180   | Check |
| O4 -S2 -LI5       | 1.555 1.555 1.555                               |        | 41.22 | Deg.  |
| PLAT779_ALERT_4_G | Suspect or Irrelevant (Bond) Angle in CIF       | .... # | 195   | Check |
| O6 -S3 -LI7       | 1.555 1.555 1.555                               |        | 41.13 | Deg.  |
| PLAT779_ALERT_4_G | Suspect or Irrelevant (Bond) Angle in CIF       | .... # | 206   | Check |
| N3 -P3 -LI7       | 1.555 1.555 1.555                               |        | 43.51 | Deg.  |
| PLAT779_ALERT_4_G | Suspect or Irrelevant (Bond) Angle in CIF       | .... # | 308   | Check |
| O8 -S4 -LI1       | 1.555 1.555 1.555                               |        | 44.95 | Deg.  |
| PLAT779_ALERT_4_G | Suspect or Irrelevant (Bond) Angle in CIF       | .... # | 318   | Check |
| N4 -P4 -LI1       | 1.555 1.555 1.555                               |        | 43.82 | Deg.  |
| PLAT779_ALERT_4_G | Suspect or Irrelevant (Bond) Angle in CIF       | .... # | 328   | Check |
| N4 -SI4 -LI1      | 1.555 1.555 1.555                               |        | 35.59 | Deg.  |
| PLAT789_ALERT_4_G | Atoms with Negative _atom_site_disorder_group   | #      | 16    | Check |
| PLAT909_ALERT_3_G | Percentage of Observed Data at Theta(Max) Still |        | 45    | %     |
| PLAT910_ALERT_3_G | Missing # of FCF Reflection(s) Below Theta(Min) |        | 3     | Note  |
| PLAT933_ALERT_2_G | Number of OMIT records in Embedded RES          | .....  | 1     | Note  |

---

0 **ALERT level A** = Most likely a serious problem - resolve or explain  
 0 **ALERT level B** = A potentially serious problem, consider carefully  
 9 **ALERT level C** = Check. Ensure it is not caused by an omission or oversight  
 51 **ALERT level G** = General information/check it is not something unexpected

3 ALERT type 1 CIF construction/syntax error, inconsistent or missing data  
 15 ALERT type 2 Indicator that the structure model may be wrong or deficient  
 6 ALERT type 3 Indicator that the structure quality may be low  
 36 ALERT type 4 Improvement, methodology, query or suggestion  
 0 ALERT type 5 Informative message, check

---

It is advisable to attempt to resolve as many as possible of the alerts in all categories. Often the minor alerts point to easily fixed oversights, errors and omissions in your CIF or refinement strategy, so attention to these fine details can be worthwhile. In order to resolve some of the more serious problems it may be necessary to carry out additional measurements or structure refinements. However, the purpose of your study may justify the reported deviations and the more serious of these should normally be commented upon in the discussion or experimental section of a paper or in the "special\_details" fields of the CIF. checkCIF was carefully designed to identify outliers and unusual parameters, but every test has its limitations and alerts that are not important in a particular case may appear. Conversely, the absence of alerts does not guarantee there are no aspects of the results needing attention. It is up to the individual to critically assess their own results and, if necessary, seek expert advice.

### **Publication of your CIF in IUCr journals**

A basic structural check has been run on your CIF. These basic checks will be run on all CIFs submitted for publication in IUCr journals (*Acta Crystallographica*, *Journal of Applied Crystallography*, *Journal of Synchrotron Radiation*); however, if you intend to submit to *Acta Crystallographica Section C* or *E* or *IUCrData*, you should make sure that full publication checks are run on the final version of your CIF prior to submission.

### **Publication of your CIF in other journals**

Please refer to the *Notes for Authors* of the relevant journal for any special instructions relating to CIF submission.

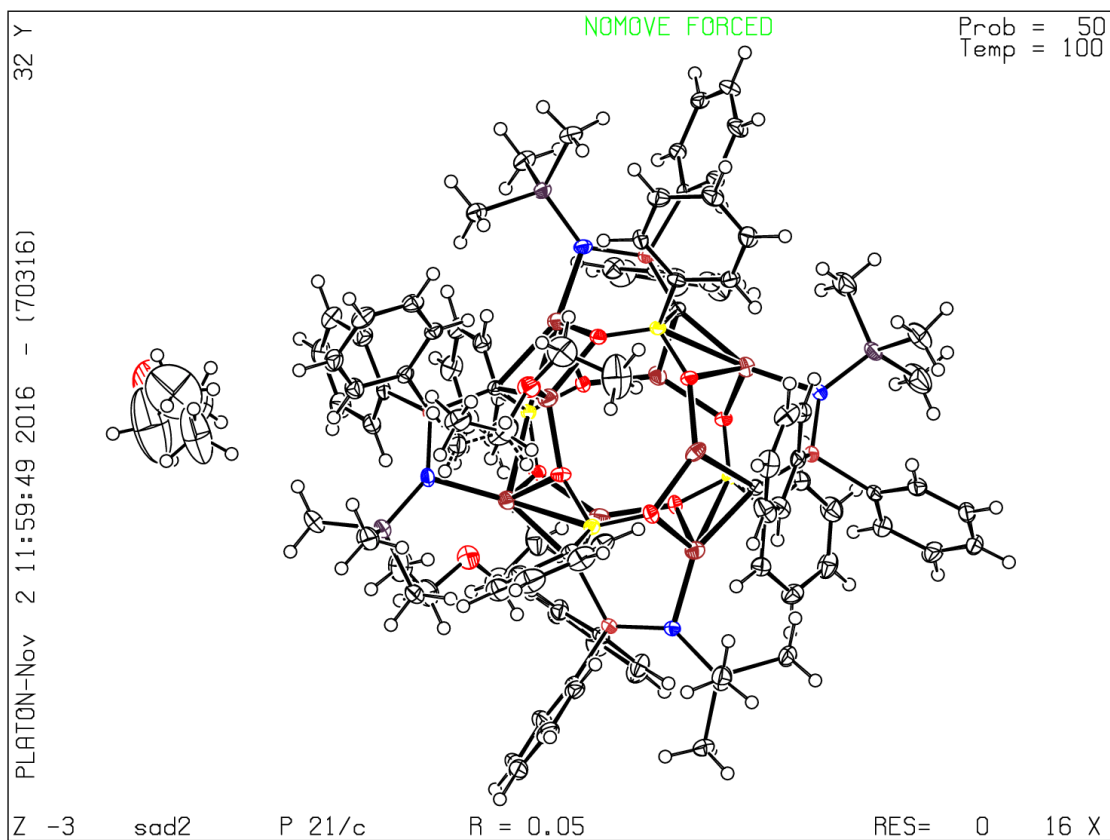



# checkCIF/PLATON report

Structure factors have been supplied for datablock(s) platon\_pl

THIS REPORT IS FOR GUIDANCE ONLY. IF USED AS PART OF A REVIEW PROCEDURE FOR PUBLICATION, IT SHOULD NOT REPLACE THE EXPERTISE OF AN EXPERIENCED CRYSTALLOGRAPHIC REFEREE.

No syntax errors found.      CIF dictionary      Interpreting this report

## Datablock: platon\_pl

---

Bond precision:    C-C = 0.0050 A

Wavelength=0.71073

Cell:                a=11.2841(10)                b=15.3705(14)                c=16.8163(15)  
                      alpha=112.315(3)                beta=90.340(3)                gamma=110.779(3)  
Temperature:    100 K

|                | Calculated                             | Reported                   |
|----------------|----------------------------------------|----------------------------|
| Volume         | 2489.2(4)                              | 2489.2(4)                  |
| Space group    | P -1                                   | P -1                       |
| Hall group     | -P 1                                   | -P 1                       |
| Moiety formula | C44 H50 K2 N2 O4 P2 S2<br>Si2, C4 H8 O | ?                          |
| Sum formula    | C48 H58 K2 N2 O5 P2 S2 Si2             | C48 H58 K2 N2 O5 P2 S2 Si2 |
| Mr             | 1003.40                                | 1003.40                    |
| Dx,g cm-3      | 1.339                                  | 1.339                      |
| Z              | 2                                      | 2                          |
| Mu (mm-1)      | 0.433                                  | 0.433                      |
| F000           | 1056.0                                 | 1056.0                     |
| F000'          | 1058.36                                |                            |
| h,k,lmax       | 13,18,19                               | 13,18,19                   |
| Nref           | 8772                                   | 8770                       |
| Tmin,Tmax      | 0.974,0.983                            | 0.653,0.745                |
| Tmin'          | 0.937                                  |                            |

Correction method= # Reported T Limits: Tmin=0.653 Tmax=0.745  
AbsCorr = EMPIRICAL

Data completeness= 1.000

Theta(max)= 24.998

R(reflections)= 0.0408( 6524)

wR2(reflections)= 0.1028( 8770)

S = 1.001

Npar= 605

---

The following ALERTS were generated. Each ALERT has the format

**test-name\_ALERT\_alert-type\_alert-level.**

Click on the hyperlinks for more details of the test.

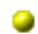

### Alert level C

|                   |                       |                    |                           |         |       |
|-------------------|-----------------------|--------------------|---------------------------|---------|-------|
| PLAT222_ALERT_3_C | Non-Solvent Resd 1    | H                  | Uiso(max)/Uiso(min) Range | 4.6     | Ratio |
| PLAT245_ALERT_2_C | U(iso) H44A           | Smaller than U(eq) | C44 by ...                | 0.017   | AngSq |
| PLAT340_ALERT_3_C | Low Bond Precision on | C-C Bonds          | .....                     | 0.00503 | Ang.  |
| PLAT350_ALERT_3_C | Short                 | C-H (X0.96,N1.08A) | C1 - H1 ..                | 0.84    | Ang.  |
| PLAT350_ALERT_3_C | Short                 | C-H (X0.96,N1.08A) | C23 - H23 ..              | 0.78    | Ang.  |

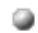

### Alert level G

|                   |                                                  |       |        |
|-------------------|--------------------------------------------------|-------|--------|
| PLAT004_ALERT_5_G | Polymeric Structure Found with Maximum Dimension | 1     | Info   |
| PLAT154_ALERT_1_G | The s.u.'s on the Cell Angles are Equal ..(Note) | 0.003 | Degree |
| PLAT164_ALERT_4_G | Nr. of Refined C-H H-Atoms in Heavy-Atom Struct. | 8     | Note   |
| PLAT720_ALERT_4_G | Number of Unusual/Non-Standard Labels .....      | 13    | Note   |
| PLAT764_ALERT_4_G | Overcomplete CIF Bond List Detected (Rep/Expd) . | 1.22  | Ratio  |
| PLAT779_ALERT_4_G | Suspect or Irrelevant (Bond) Angle in CIF .... # | 99    | Check  |
|                   | N1 -SI1 -K1 1.555 1.555 1.555                    | 39.65 | Deg.   |
| PLAT779_ALERT_4_G | Suspect or Irrelevant (Bond) Angle in CIF .... # | 123   | Check  |
|                   | O2 -S1 -K1 1.555 1.555 1.555                     | 32.80 | Deg.   |
| PLAT779_ALERT_4_G | Suspect or Irrelevant (Bond) Angle in CIF .... # | 127   | Check  |
|                   | O2 -S1 -K2 1.555 1.555 1.555                     | 34.31 | Deg.   |
| PLAT779_ALERT_4_G | Suspect or Irrelevant (Bond) Angle in CIF .... # | 211   | Check  |
|                   | N2 -P2 -K1 1.555 1.555 1.555                     | 40.54 | Deg.   |
| PLAT779_ALERT_4_G | Suspect or Irrelevant (Bond) Angle in CIF .... # | 222   | Check  |
|                   | O3 -S2 -K1 1.555 1.555 1.555                     | 42.50 | Deg.   |
| PLAT793_ALERT_4_G | The Model has Chirality at S1 (Centro SPGR)      | S     | Verify |
| PLAT793_ALERT_4_G | The Model has Chirality at S2 (Centro SPGR)      | S     | Verify |
| PLAT909_ALERT_3_G | Percentage of Observed Data at Theta(Max) Still  | 59    | %      |
| PLAT910_ALERT_3_G | Missing # of FCF Reflection(s) Below Theta(Min)  | 3     | Note   |
| PLAT933_ALERT_2_G | Number of OMIT records in Embedded RES .....     | 1     | Note   |
| PLAT978_ALERT_2_G | Number C-C Bonds with Positive Residual Density  | 1     | Note   |

0 **ALERT level A** = Most likely a serious problem - resolve or explain  
 0 **ALERT level B** = A potentially serious problem, consider carefully  
 5 **ALERT level C** = Check. Ensure it is not caused by an omission or oversight  
 16 **ALERT level G** = General information/check it is not something unexpected

1 ALERT type 1 CIF construction/syntax error, inconsistent or missing data  
 3 ALERT type 2 Indicator that the structure model may be wrong or deficient  
 6 ALERT type 3 Indicator that the structure quality may be low  
 10 ALERT type 4 Improvement, methodology, query or suggestion  
 1 ALERT type 5 Informative message, check

It is advisable to attempt to resolve as many as possible of the alerts in all categories. Often the minor alerts point to easily fixed oversights, errors and omissions in your CIF or refinement strategy, so attention to these fine details can be worthwhile. In order to resolve some of the more serious problems it may be necessary to carry out additional measurements or structure refinements. However, the purpose of your study may justify the reported deviations and the more serious of these should normally be commented upon in the discussion or experimental section of a paper or in the "special\_details" fields of the CIF. checkCIF was carefully designed to identify outliers and unusual parameters, but every test has its limitations and alerts that are not important in a particular case may appear. Conversely, the absence of alerts does not guarantee there are no aspects of the results needing attention. It is up to the individual to critically assess their own results and, if necessary, seek expert advice.

### **Publication of your CIF in IUCr journals**

A basic structural check has been run on your CIF. These basic checks will be run on all CIFs submitted for publication in IUCr journals (*Acta Crystallographica*, *Journal of Applied Crystallography*, *Journal of Synchrotron Radiation*); however, if you intend to submit to *Acta Crystallographica Section C* or *E* or *IUCrData*, you should make sure that full publication checks are run on the final version of your CIF prior to submission.

### **Publication of your CIF in other journals**

Please refer to the *Notes for Authors* of the relevant journal for any special instructions relating to CIF submission.

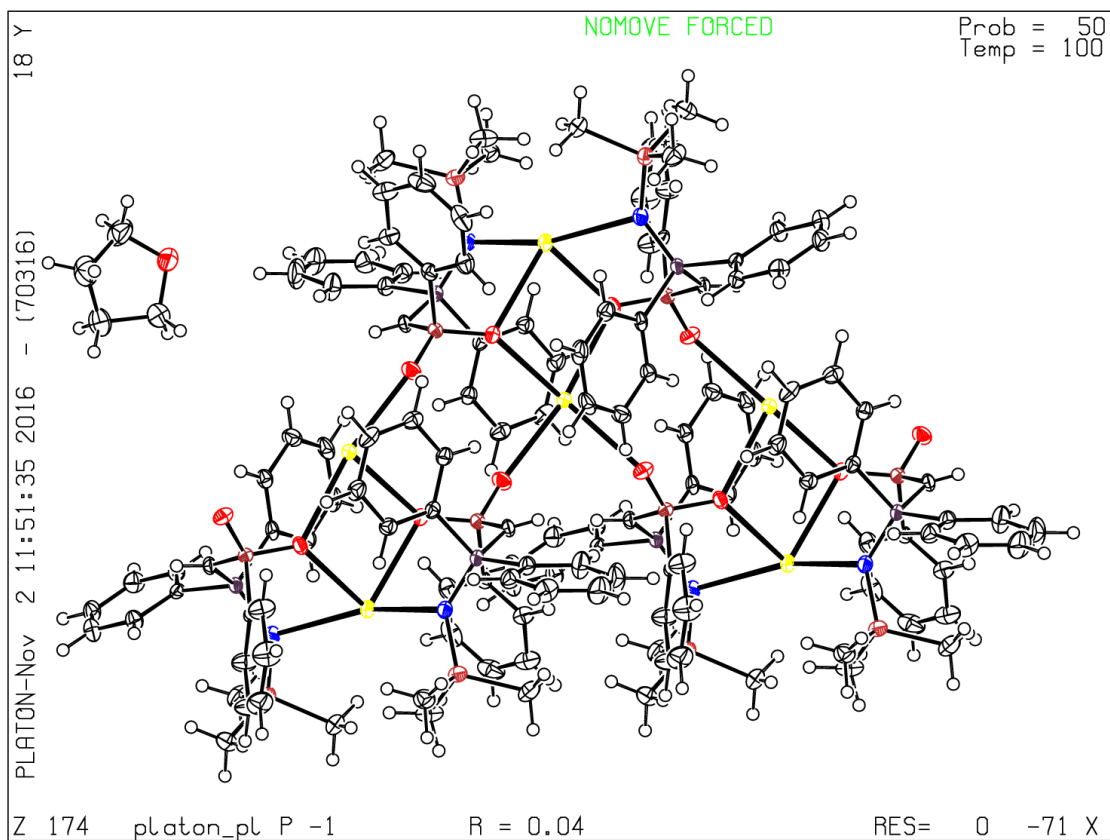

Supplement: s1 [file s1]
