# Supplementary material
Source: MDPI journal article supplement (https://www.mdpi.com/2304-6740/4/4/40)
Supplement: s1 [file s1]

# Supplementary Materials: Synthesis and Characterization of a Sulfonyl- and Iminophosphoryl-Functionalized Methanide and Methandiide

Kai-Stephan Feichtner and Viktoria H. Gessner

## Index

|                                                     |     |
|-----------------------------------------------------|-----|
| 1. NMR spectra of the isolated compounds            | S2  |
| 2. Crystal Structure Determination                  | S10 |
| 2.1. Crystal Structure Determination of <b>1</b>    | S11 |
| 2.2. Crystal Structure Determination of <b>1-K</b>  | S12 |
| 2.3. Crystal Structure Determination of <b>1-Li</b> | S15 |

## 1. NMR Spectra of the Isolated Compounds

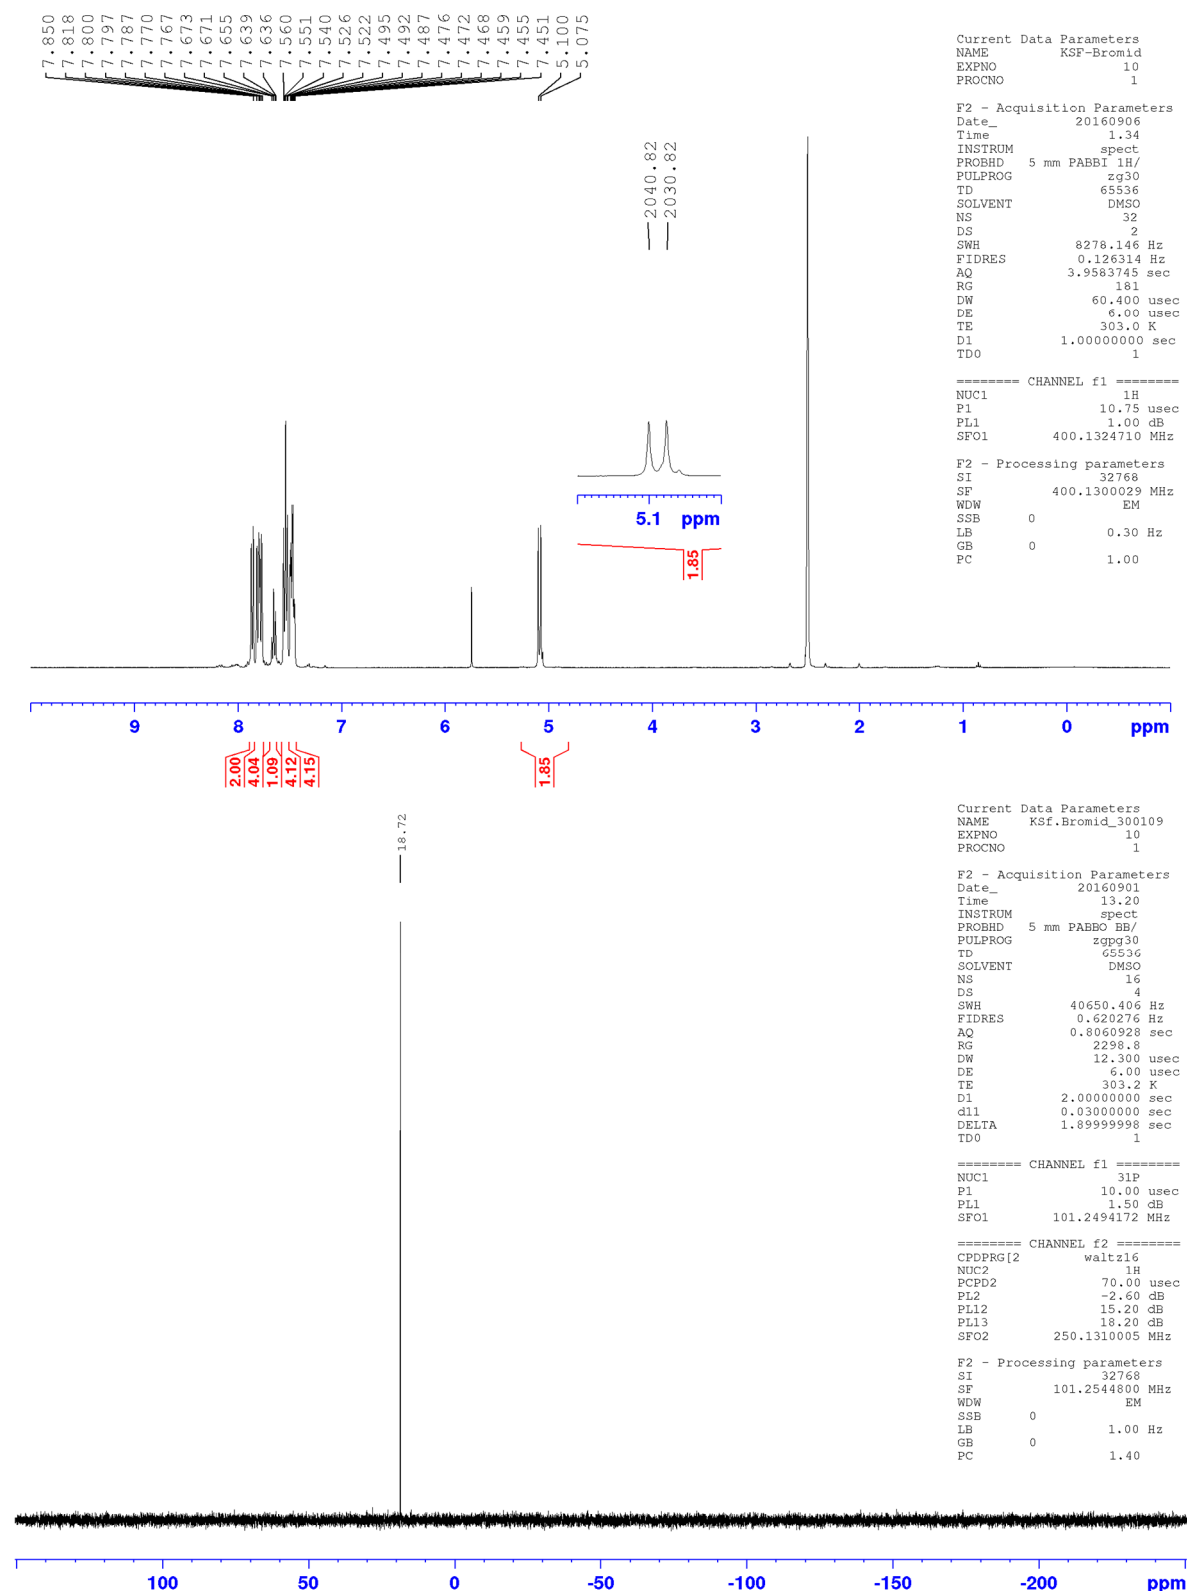Figure S1. <sup>1</sup>H NMR and <sup>31</sup>P{<sup>1</sup>H} NMR spectrum of bromide 3 in d<sub>6</sub>-DMSO.

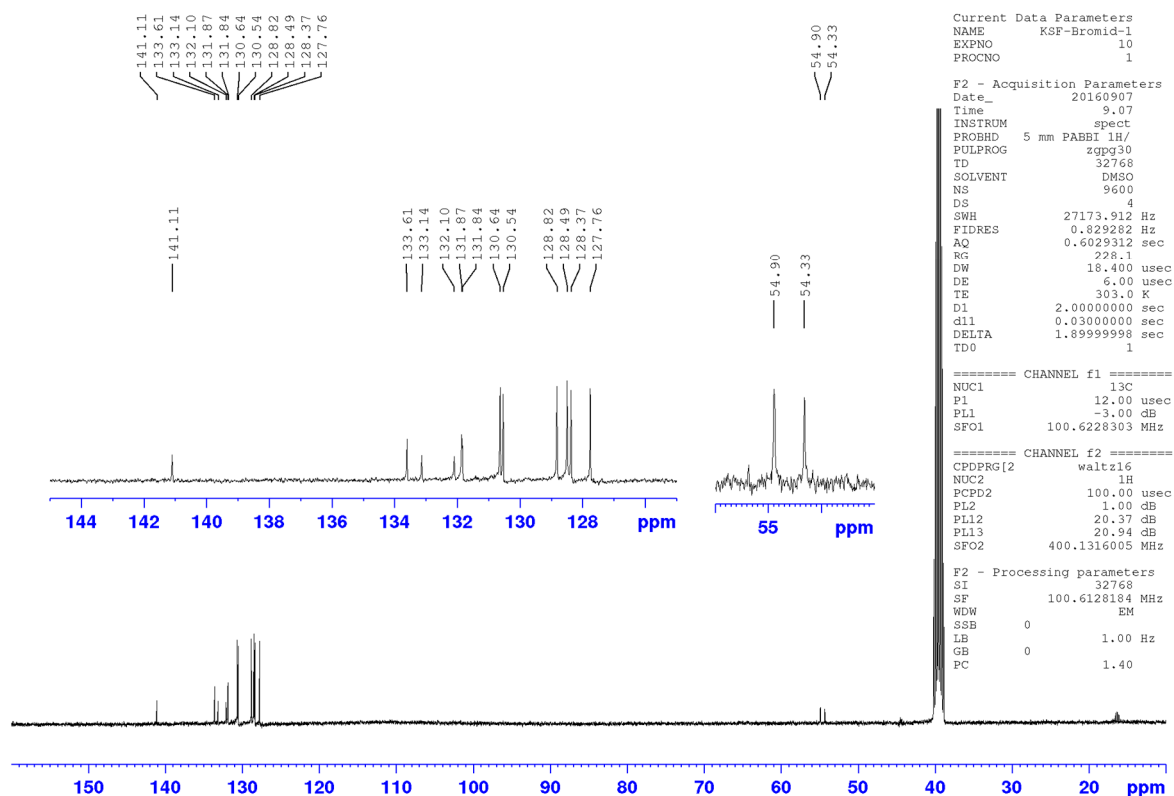Figure S2.  $^{13}\text{C}\{^1\text{H}\}$  NMR spectrum of bromide 3  $\text{d}_6$ -DMSO.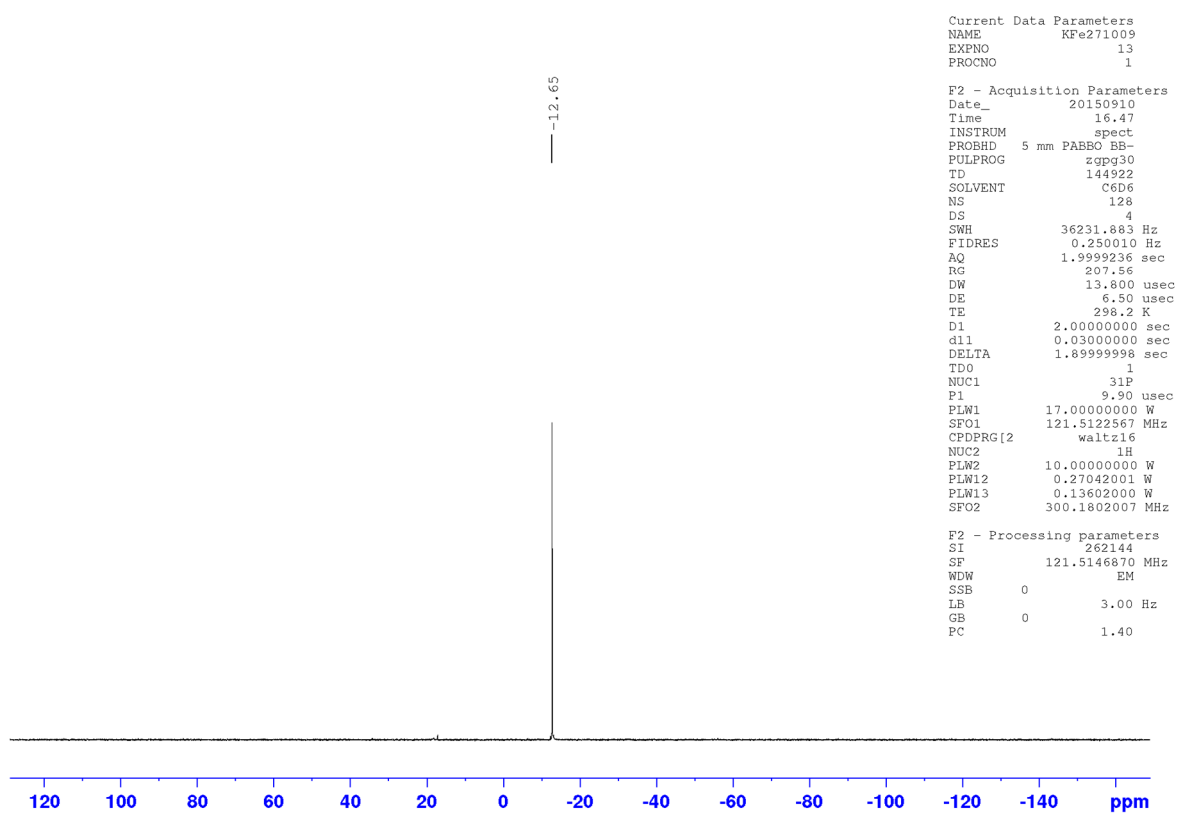Figure S3.  $^{31}\text{P}\{^1\text{H}\}$  NMR spectrum of ligand 1 in  $\text{C}_6\text{D}_6$ .

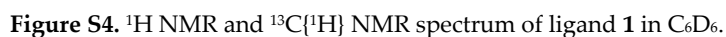

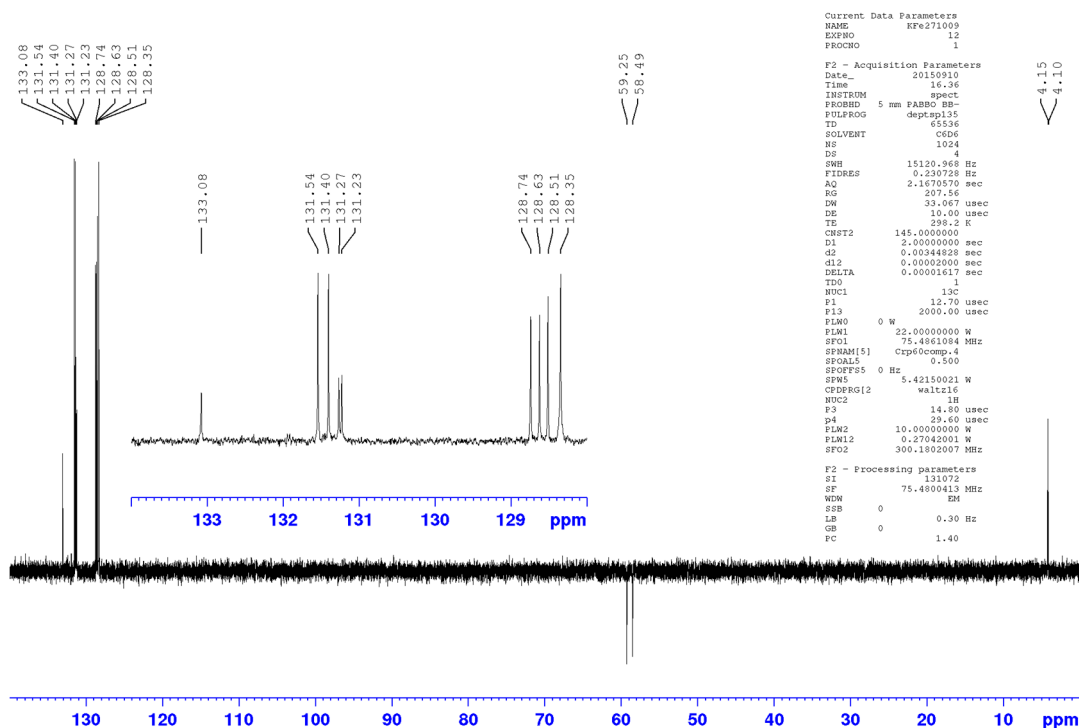Figure S5. DEPT-135 NMR spectrum of ligand 1 in C<sub>6</sub>D<sub>6</sub>.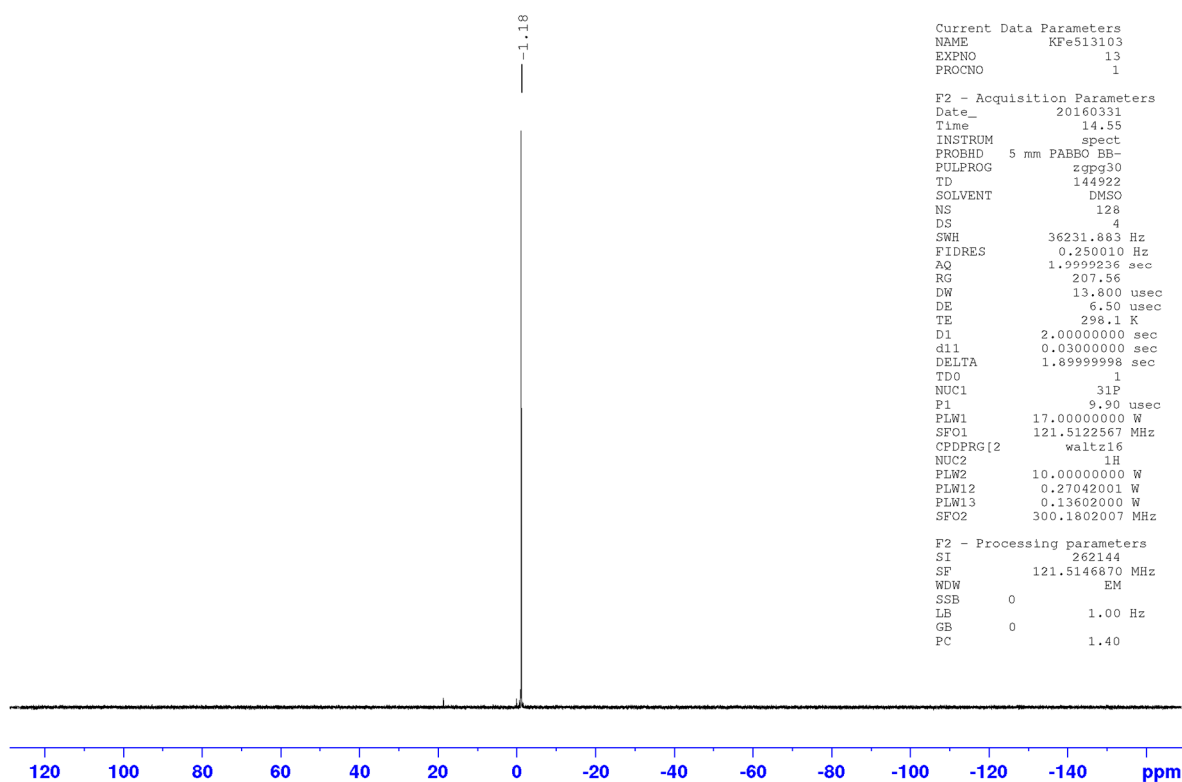Figure S6. <sup>31</sup>P{<sup>1</sup>H} NMR spectrum of monoanion 1-K in d<sub>6</sub>-DMSO.

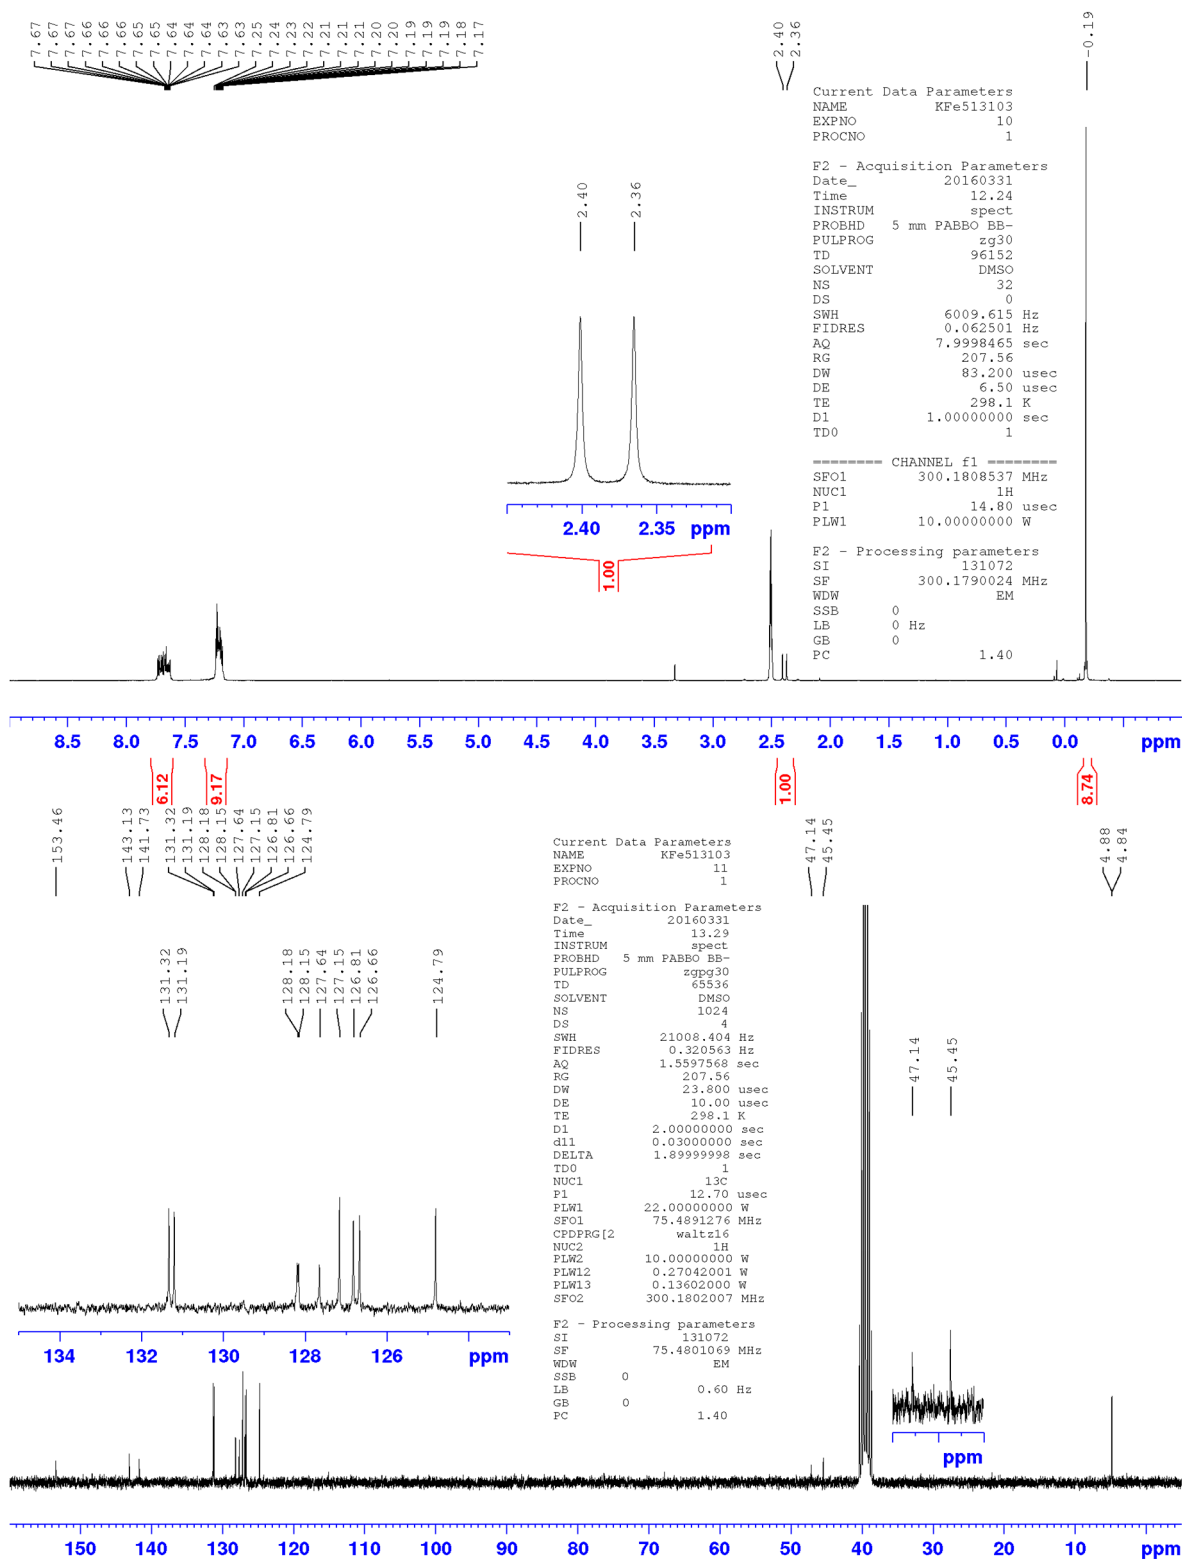Figure S7.  $^1\text{H}$  NMR and  $^{13}\text{C}\{^1\text{H}\}$  NMR spectrum of monoanion 1-K in  $\text{d}_6$ -DMSO.

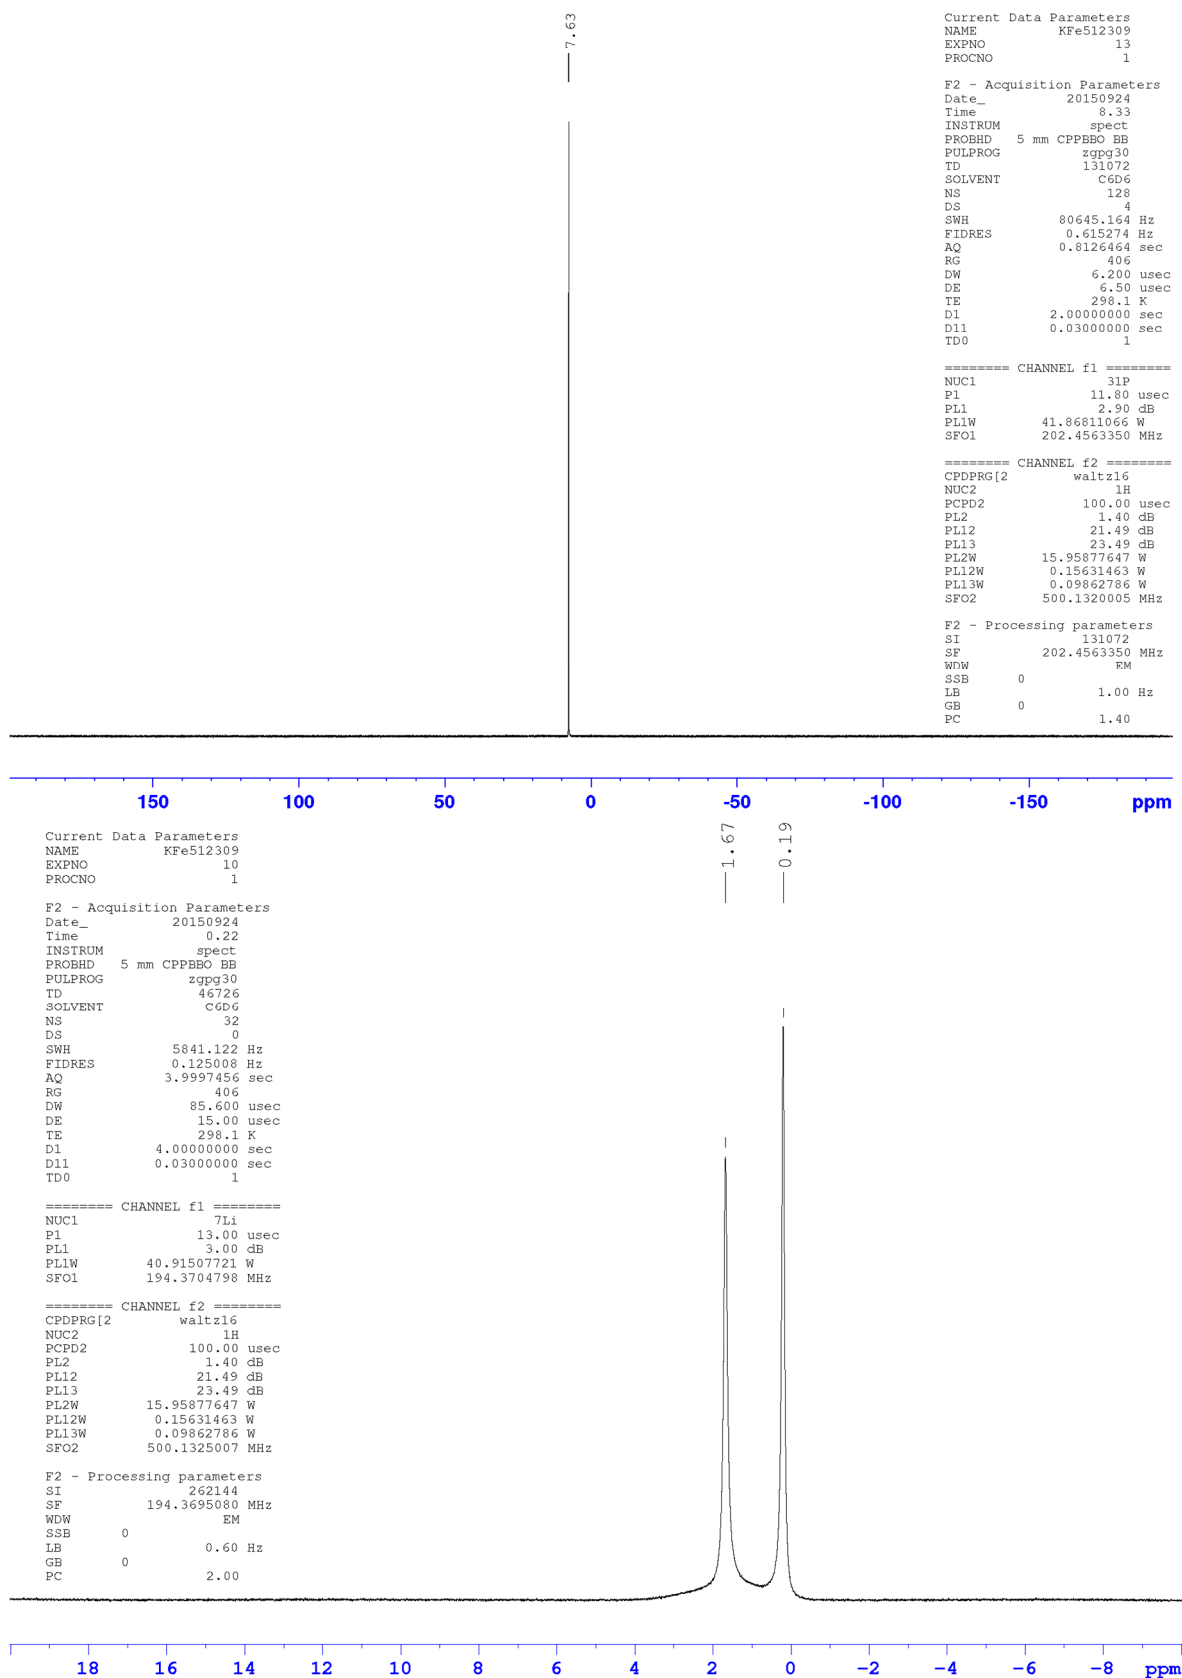Figure S8.  $^{31}\text{P}\{^1\text{H}\}$  NMR and  $^7\text{Li}\{^1\text{H}\}$  NMR spectrum of dianion 1-Li<sub>2</sub> in C<sub>6</sub>D<sub>6</sub>.

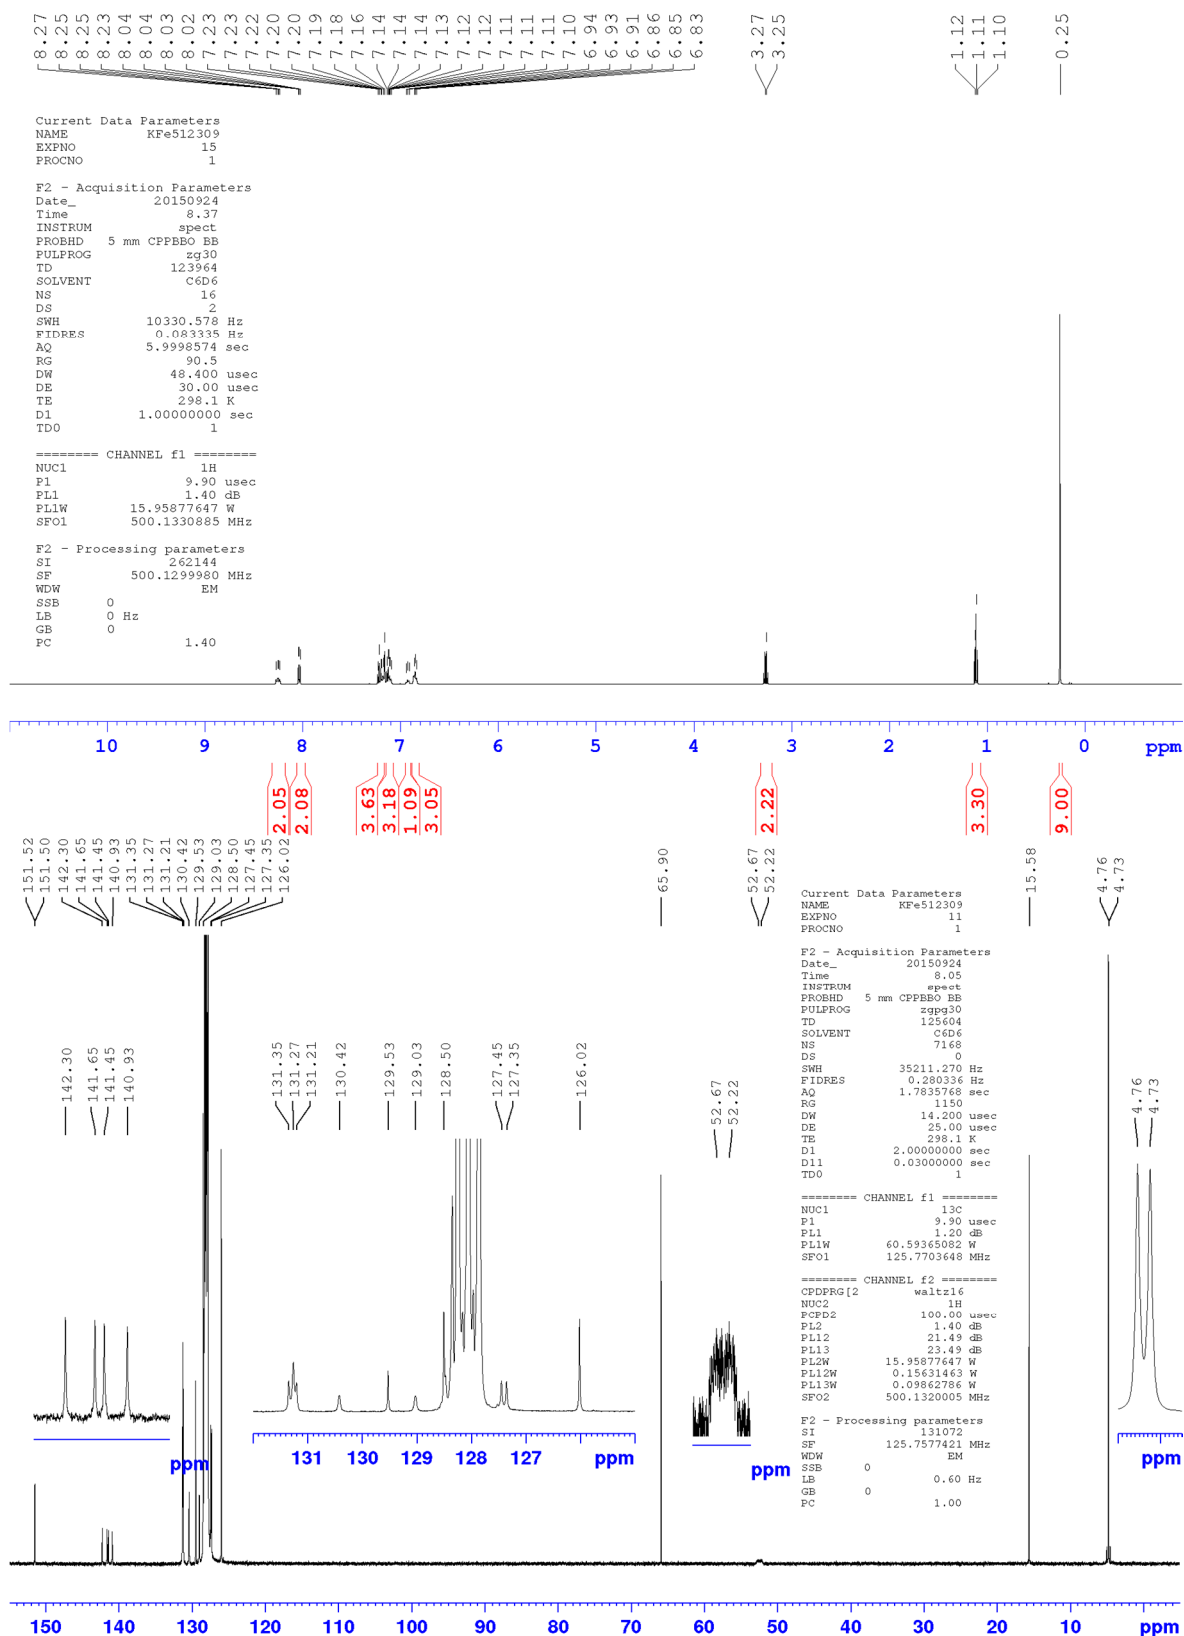Figure S9.  $^1\text{H}$  NMR and  $^{13}\text{C}\{^1\text{H}\}$  NMR spectrum of dianion 1-Li<sub>2</sub> in C<sub>6</sub>D<sub>6</sub>.



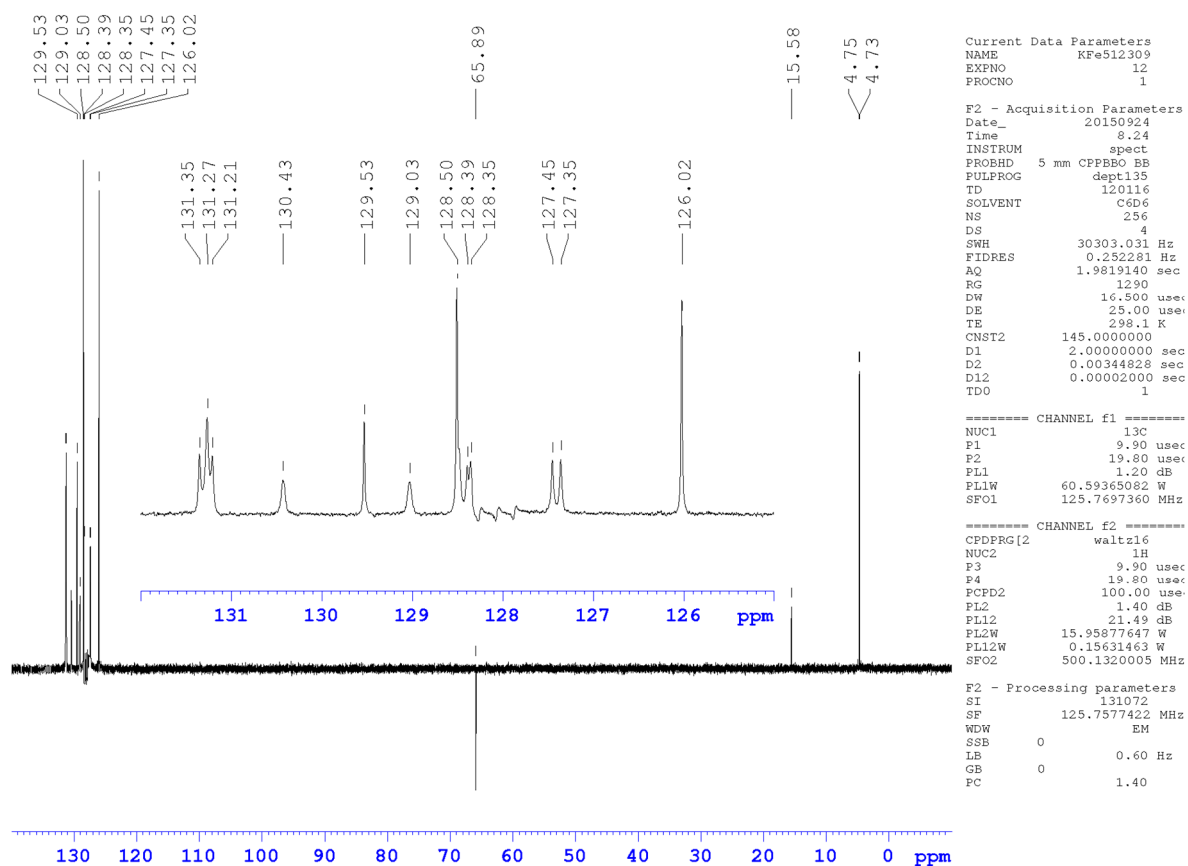Figure S10. DEPT-135 NMR spectrum of dianion 1-Li<sub>2</sub> in C<sub>6</sub>D<sub>6</sub>.

## 2. Crystal Structure Determination

Data collection of all compounds was conducted with a Bruker APEX2-CCD (D8 three-circle goniometer). The structures were solved using direct methods, refined with the Shelx software package [50] and expanded using Fourier techniques. The crystals of all compounds were mounted in an inert oil (perfluoropolyalkylether). Crystal structure determinations were effected at 100 K. Crystallographic data (excluding structure factors) have been deposited with the Cambridge Crystallographic Data Centre as supplementary publication no. CCDC-1514516–1514518. Copies of the data can be obtained free of charge on application to Cambridge Crystallographic Data Centre, 12 Union Road, Cambridge CB2 1EZ, UK; (fax: (+44) 1223-336-033; email: deposit@ccdc.cam.ac.uk).

**Table S1.** Data collection and structure refinement details for compounds **1**, **1-K** and **1-Li2**.

| Compound                                              | <b>1</b>                                             | <b>1-K</b>                                                                                                                 | <b>1-Li2</b>                                                                                                                     |
|-------------------------------------------------------|------------------------------------------------------|----------------------------------------------------------------------------------------------------------------------------|----------------------------------------------------------------------------------------------------------------------------------|
| CCDC No.                                              | 1514516                                              | 1514518                                                                                                                    | 1514517                                                                                                                          |
| Formula                                               | C <sub>22</sub> H <sub>26</sub> NO <sub>2</sub> PSSi | C <sub>48</sub> H <sub>58</sub> K <sub>2</sub> N <sub>2</sub> O <sub>5</sub> P <sub>2</sub> S <sub>2</sub> Si <sub>2</sub> | C <sub>98</sub> H <sub>121</sub> Li <sub>8</sub> N <sub>4</sub> O <sub>10.50</sub> P <sub>4</sub> S <sub>4</sub> Si <sub>4</sub> |
| Formula weight (g·mol <sup>-1</sup> )                 | 427.56                                               | 1003.40                                                                                                                    | 1942.98                                                                                                                          |
| Temperature (K)                                       | 100(2)                                               | 100(2)                                                                                                                     | 100(2)                                                                                                                           |
| Wave length (Å)                                       | 0.71073                                              | 0.71073                                                                                                                    | 0.71073                                                                                                                          |
| Crystal system                                        | Triclinic                                            | Triclinic                                                                                                                  | Monoclinic                                                                                                                       |
| Space group                                           | <i>P</i> -1                                          | <i>P</i> -1                                                                                                                | <i>P</i> 2 <sub>1</sub> /c                                                                                                       |
| <i>a</i> (Å)                                          | 9.2087(4)                                            | 11.2841(10)                                                                                                                | 25.265(3)                                                                                                                        |
| <i>b</i> (Å)                                          | 10.5543(4)                                           | 15.3705(14)                                                                                                                | 18.972(2)                                                                                                                        |
| <i>c</i> (Å)                                          | 12.6990(5)                                           | 16.8163(15)                                                                                                                | 24.452(3)                                                                                                                        |
| $\alpha$ (°)                                          | 71.7520(10)                                          | 112.315(3)                                                                                                                 | 90                                                                                                                               |
| $\beta$ (°)                                           | 70.2450(10)                                          | 90.340(3)                                                                                                                  | 116.547(3)                                                                                                                       |
| $\gamma$ (°)                                          | 73.1050(10)                                          | 110.779(3)                                                                                                                 | 90                                                                                                                               |
| Volume (Å <sup>3</sup> )                              | 1079.35(8)                                           | 2489.2(4)                                                                                                                  | 10,485(2)                                                                                                                        |
| <i>Z</i>                                              | 2                                                    | 2                                                                                                                          | 4                                                                                                                                |
| Calc. density (Mg·m <sup>-3</sup> )                   | 1.316                                                | 1.339                                                                                                                      | 1.231                                                                                                                            |
| $\mu$ (MoK $\alpha$ ) (mm <sup>-1</sup> )             | 0.298                                                | 0.433                                                                                                                      | 0.254                                                                                                                            |
| <i>F</i> (000)                                        | 452                                                  | 1056                                                                                                                       | 4100                                                                                                                             |
| Crystal dimensions (mm)                               | 0.40 × 0.30 × 0.29                                   | 0.15 × 0.05 × 0.04                                                                                                         | 0.150 × 0.060 × 0.060                                                                                                            |
| Theta range (°)                                       | 1.75–25.00                                           | 1.956–24.998                                                                                                               | 1.442–24.997                                                                                                                     |
|                                                       | −10 ≤ <i>h</i> ≤ 10                                  | −13 ≤ <i>h</i> ≤ 13                                                                                                        | −30 ≤ <i>h</i> ≤ 30                                                                                                              |
| Index ranges                                          | −12 ≤ <i>k</i> ≤ 12                                  | −18 ≤ <i>k</i> ≤ 18                                                                                                        | −22 ≤ <i>k</i> ≤ 22                                                                                                              |
|                                                       | −15 ≤ <i>l</i> ≤ 15                                  | −19 ≤ <i>l</i> ≤ 19                                                                                                        | −29 ≤ <i>l</i> ≤ 29                                                                                                              |
| Reflections collected                                 | 13,159                                               | 37,279                                                                                                                     | 107,435                                                                                                                          |
| Independent reflections                               | 3796 ( <i>R</i> (int) = 0.0192)                      | 8770 ( <i>R</i> (int) = 0.0755)                                                                                            | 18,468 ( <i>R</i> (int) = 0.1048)                                                                                                |
| Data/Restraints/Parameter                             | 3796/0/264                                           | 8770/0/605                                                                                                                 | 18,468/0/1254                                                                                                                    |
| Goodness-of-fit on <i>F</i> <sup>2</sup>              | 1.049                                                | 1.001                                                                                                                      | 1.012                                                                                                                            |
| Final <i>R</i> indices                                | <i>R</i> 1 = 0.0290,                                 | <i>R</i> 1 = 0.0408,                                                                                                       | <i>R</i> 1 = 0.0494,                                                                                                             |
| ( <i>I</i> > 2sigma( <i>I</i> ))                      | <i>wR</i> 2 = 0.1137                                 | <i>wR</i> 2 = 0.0917                                                                                                       | <i>wR</i> 2 = 0.0947                                                                                                             |
| Largest diff. peak and hole hole (e·Å <sup>-3</sup> ) | 0.317 and −0.385 e·Å <sup>-3</sup>                   | 0.487 and −0.378 e·Å <sup>-3</sup>                                                                                         | 0.530 and −0.377 e·Å <sup>-3</sup>                                                                                               |

2.1. Crystal Structure Determination of **1**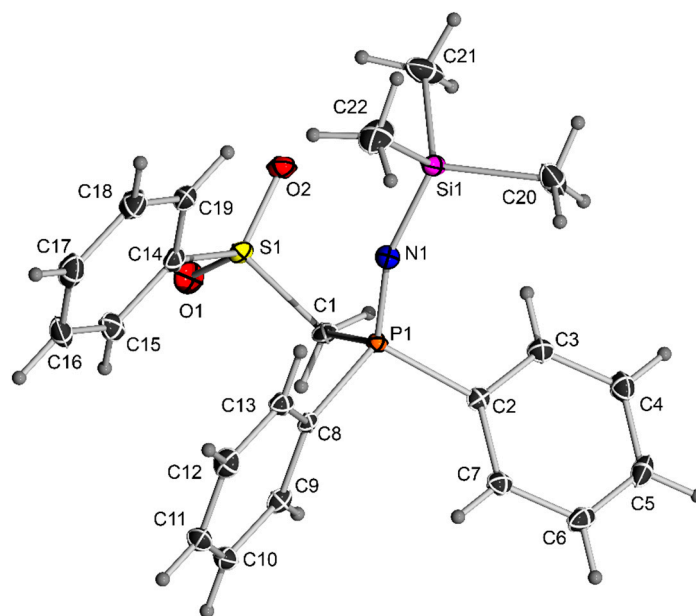

**Figure S11.** ORTEP Plot of **1**. Ellipsoids are drawn at the 50% probability level.

**Table S2.** Atomic coordinates ( $\times 10^4$ ) and equivalent isotropic displacement parameters ( $\text{\AA}^2 \times 10^3$ ) **1**. U(eq) is defined as one third of the trace of the orthogonalized  $U_{ij}$  tensor.

|       | <i>x</i>  | <i>y</i>  | <i>z</i> | U(eq) |
|-------|-----------|-----------|----------|-------|
| S(1)  | 5367(1)   | 7144(1)   | 4370(1)  | 12(1) |
| O(1)  | 4793(1)   | 7441(1)   | 5494(1)  | 20(1) |
| C(2)  | 9817(2)   | 4169(2)   | 3253(1)  | 11(1) |
| O(2)  | 4379(1)   | 6607(1)   | 4022(1)  | 16(1) |
| C(4)  | 10,049(2) | 1722(2)   | 3791(1)  | 18(1) |
| C(3)  | 9135(2)   | 3031(2)   | 3581(1)  | 14(1) |
| C(5)  | 11,640(2) | 1545(2)   | 3681(1)  | 19(1) |
| C(6)  | 12,326(2) | 2664(2)   | 3362(1)  | 17(1) |
| C(7)  | 11,417(2) | 3973(2)   | 3146(1)  | 13(1) |
| C(8)  | 9713(2)   | 7097(2)   | 2593(1)  | 10(1) |
| C(9)  | 10,353(2) | 7224(2)   | 3400(1)  | 13(1) |
| C(10) | 11,203(2) | 8217(2)   | 3131(1)  | 15(1) |
| C(11) | 11,435(2) | 9105(2)   | 2044(1)  | 16(1) |
| C(12) | 10,808(2) | 8991(2)   | 1241(1)  | 16(1) |
| C(13) | 9949(2)   | 7989(2)   | 1504(1)  | 13(1) |
| C(14) | 5794(2)   | 8644(2)   | 3331(1)  | 13(1) |
| C(15) | 6415(2)   | 9535(2)   | 3589(1)  | 18(1) |
| C(16) | 6754(2)   | 10,697(2) | 2759(2)  | 21(1) |
| C(17) | 6456(2)   | 10,981(2) | 1699(2)  | 22(1) |
| C(18) | 5828(2)   | 10,090(2) | 1457(2)  | 20(1) |
| C(19) | 5481(2)   | 8912(2)   | 2279(1)  | 16(1) |
| C(20) | 8235(2)   | 4085(2)   | 577(2)   | 23(1) |
| C(21) | 4974(2)   | 5406(2)   | 1752(2)  | 29(1) |
| C(22) | 7078(2)   | 7103(2)   | −231(2)  | 29(1) |
| C(1)  | 7196(2)   | 5953(2)   | 4331(1)  | 12(1) |
| N(1)  | 7764(2)   | 6028(1)   | 1966(1)  | 13(1) |
| Si(1) | 7045(1)   | 5660(1)   | 1069(1)  | 14(1) |
| P(1)  | 8554(1)   | 5831(1)   | 2900(1)  | 9(1)  |

**Table S3.** Anisotropic displacement parameters ( $\text{\AA}^2 \times 10^3$ ) for **1**. The anisotropic displacement factor exponent takes the form:  $-2p^2[h^2a^*U^{11} + \dots + 2hk a^* b^* U^{12}]$ .

|       | U <sup>11</sup> | U <sup>22</sup> | U <sup>33</sup> | U <sup>23</sup> | U <sup>13</sup> | U <sup>12</sup> |
|-------|-----------------|-----------------|-----------------|-----------------|-----------------|-----------------|
| S(1)  | 8(1)            | 15(1)           | 13(1)           | −4(1)           | 0(1)            | −3(1)           |
| O(1)  | 15(1)           | 26(1)           | 15(1)           | −10(1)          | 3(1)            | −4(1)           |
| C(2)  | 11(1)           | 13(1)           | 8(1)            | −3(1)           | −2(1)           | −2(1)           |
| O(2)  | 11(1)           | 18(1)           | 19(1)           | −3(1)           | −4(1)           | −6(1)           |
| C(4)  | 22(1)           | 13(1)           | 19(1)           | −3(1)           | −7(1)           | −4(1)           |
| C(3)  | 13(1)           | 15(1)           | 16(1)           | −4(1)           | −4(1)           | −3(1)           |
| C(5)  | 22(1)           | 14(1)           | 17(1)           | −5(1)           | −8(1)           | 5(1)            |
| C(6)  | 12(1)           | 23(1)           | 17(1)           | −10(1)          | −4(1)           | 2(1)            |
| C(7)  | 13(1)           | 17(1)           | 12(1)           | −6(1)           | −3(1)           | −3(1)           |
| C(8)  | 6(1)            | 10(1)           | 14(1)           | −5(1)           | 0(1)            | −1(1)           |
| C(9)  | 12(1)           | 14(1)           | 12(1)           | −2(1)           | −2(1)           | −1(1)           |
| C(10) | 13(1)           | 17(1)           | 18(1)           | −7(1)           | −6(1)           | −2(1)           |
| C(11) | 13(1)           | 14(1)           | 23(1)           | −4(1)           | −5(1)           | −5(1)           |
| C(12) | 16(1)           | 14(1)           | 14(1)           | 1(1)            | −2(1)           | −5(1)           |
| C(13) | 11(1)           | 15(1)           | 12(1)           | −5(1)           | −3(1)           | −1(1)           |
| C(14) | 9(1)            | 12(1)           | 16(1)           | −6(1)           | −1(1)           | 0(1)            |
| C(15) | 16(1)           | 21(1)           | 19(1)           | −11(1)          | −1(1)           | −4(1)           |
| C(16) | 18(1)           | 18(1)           | 28(1)           | −13(1)          | −1(1)           | −6(1)           |
| C(17) | 21(1)           | 14(1)           | 28(1)           | −3(1)           | −4(1)           | −3(1)           |
| C(18) | 22(1)           | 15(1)           | 21(1)           | −2(1)           | −9(1)           | 0(1)            |
| C(19) | 13(1)           | 14(1)           | 23(1)           | −6(1)           | −6(1)           | 0(1)            |
| C(20) | 23(1)           | 22(1)           | 27(1)           | −12(1)          | −1(1)           | −10(1)          |
| C(21) | 16(1)           | 48(1)           | 34(1)           | −24(1)          | −2(1)           | −11(1)          |
| C(22) | 36(1)           | 30(1)           | 19(1)           | −6(1)           | −16(1)          | 4(1)            |
| C(1)  | 10(1)           | 13(1)           | 11(1)           | −1(1)           | −2(1)           | −3(1)           |
| N(1)  | 12(1)           | 13(1)           | 14(1)           | −4(1)           | −4(1)           | −3(1)           |
| Si(1) | 11(1)           | 18(1)           | 14(1)           | −7(1)           | −4(1)           | −3(1)           |
| P(1)  | 8(1)            | 10(1)           | 10(1)           | −2(1)           | −2(1)           | −2(1)           |

## 2.2. Crystal Structure Determination of **1-K**

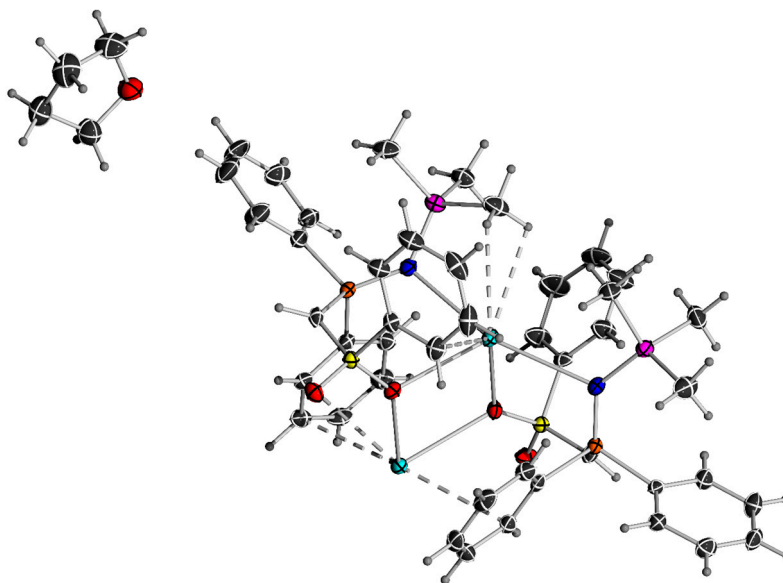

**Figure S12.** ORTEP Plot of **1-K**. Ellipsoids are drawn at the 50% probability level.

**Table S4.** Atomic coordinates ( $\times 10^4$ ) and equivalent isotropic displacement parameters ( $\text{\AA}^2 \times 10^3$ ) **1-K**.  
 $U(\text{eq})$  is defined as one third of the trace of the orthogonalized  $U_{ij}$  tensor.

|       | <i>x</i> | <i>y</i>  | <i>z</i> | <i>U</i> (eq) |
|-------|----------|-----------|----------|---------------|
| K(1)  | 3016(1)  | 5758(1)   | 2821(1)  | 22(1)         |
| O(1)  | −1072(2) | 4638(2)   | 875(1)   | 23(1)         |
| Si(1) | 2400(1)  | 8035(1)   | 4597(1)  | 20(1)         |
| N(1)  | 2103(2)  | 7356(2)   | 3505(2)  | 20(1)         |
| P(1)  | 1440(1)  | 7413(1)   | 2714(1)  | 16(1)         |
| S(1)  | −144(1)  | 5233(1)   | 1669(1)  | 16(1)         |
| C(1)  | 25(3)    | 6430(2)   | 2099(2)  | 18(1)         |
| K(2)  | 2284(1)  | 4871(1)   | 179(1)   | 20(1)         |
| O(2)  | 1124(2)  | 5187(1)   | 1596(1)  | 19(1)         |
| Si(2) | 3154(1)  | 3727(1)   | 3375(1)  | 20(1)         |
| N(2)  | 3154(2)  | 3846(2)   | 2420(2)  | 19(1)         |
| P(2)  | 3626(1)  | 3350(1)   | 1554(1)  | 15(1)         |
| S(2)  | 5423(1)  | 5251(1)   | 1540(1)  | 16(1)         |
| C(2)  | 1024(3)  | 8526(2)   | 3019(2)  | 16(1)         |
| C(38) | 6579(3)  | 7665(2)   | 3860(2)  | 32(1)         |
| C(13) | 2285(3)  | 7226(2)   | 1108(2)  | 20(1)         |
| C(17) | −1651(3) | 3645(3)   | 3464(2)  | 37(1)         |
| C(11) | 4475(3)  | 7986(2)   | 962(2)   | 27(1)         |
| C(15) | −1382(3) | 3568(2)   | 2032(2)  | 33(1)         |
| C(14) | −754(3)  | 4610(2)   | 2372(2)  | 18(1)         |
| C(44) | 3483(4)  | 5001(3)   | 4276(2)  | 34(1)         |
| C(16) | −1818(4) | 3082(3)   | 2579(2)  | 41(1)         |
| C(40) | 7162(3)  | 6392(3)   | 4030(2)  | 33(1)         |
| C(39) | 7121(3)  | 7348(3)   | 4377(2)  | 35(1)         |
| C(3)  | −82(3)   | 8516(2)   | 3383(2)  | 23(1)         |
| O(3)  | 4257(2)  | 5433(2)   | 1433(1)  | 20(1)         |
| C(4)  | −344(3)  | 9382(2)   | 3708(2)  | 28(1)         |
| O(4)  | 6423(2)  | 5606(2)   | 1073(1)  | 24(1)         |
| C(5)  | 491(3)   | 10,274(2) | 3677(2)  | 27(1)         |
| C(6)  | 1580(3)  | 10,290(2) | 3313(2)  | 27(1)         |
| C(7)  | 1849(3)  | 9423(2)   | 2986(2)  | 21(1)         |
| C(8)  | 2627(3)  | 7598(2)   | 2001(2)  | 17(1)         |
| C(9)  | 3908(3)  | 8162(2)   | 2365(2)  | 24(1)         |
| C(10) | 4825(3)  | 8363(2)   | 1850(2)  | 29(1)         |
| C(12) | 3210(3)  | 7407(2)   | 584(2)   | 25(1)         |
| C(21) | 2958(3)  | 9445(2)   | 4964(2)  | 34(1)         |
| C(20) | 958(3)   | 7649(3)   | 5114(2)  | 32(1)         |
| C(19) | −553(3)  | 5168(2)   | 3254(2)  | 31(1)         |
| C(18) | −1008(4) | 4678(3)   | 3797(2)  | 38(1)         |
| C(22) | 3695(3)  | 7813(3)   | 5082(2)  | 30(1)         |
| C(32) | 1725(3)  | 2413(2)   | −883(2)  | 24(1)         |
| C(31) | 2685(3)  | 2787(2)   | −184(2)  | 19(1)         |
| C(30) | 2386(3)  | 2947(2)   | 647(2)   | 18(1)         |
| C(29) | 2613(3)  | 1361(2)   | 1361(2)  | 26(1)         |
| C(28) | 2626(3)  | 461(2)    | 1346(2)  | 34(1)         |
| C(27) | 3774(4)  | 349(3)    | 1397(3)  | 43(1)         |
| C(26) | 4890(4)  | 1118(3)   | 1456(3)  | 47(1)         |
| C(25) | 4881(3)  | 2017(3)   | 1456(2)  | 36(1)         |
| C(24) | 3737(3)  | 2153(2)   | 1415(2)  | 22(1)         |

|       |         |         |         |       |
|-------|---------|---------|---------|-------|
| C(23) | 5073(3) | 4054(2) | 1354(2) | 18(1) |
| C(33) | 461(3)  | 2194(2) | −759(2) | 26(1) |
| C(34) | 160(3)  | 2368(2) | 66(2)   | 26(1) |
| C(35) | 1116(3) | 2745(2) | 768(2)  | 21(1) |
| C(36) | 6097(3) | 6067(2) | 2659(2) | 18(1) |
| C(37) | 6084(3) | 7038(2) | 3006(2) | 26(1) |
| C(41) | 6650(3) | 5750(2) | 3170(2) | 24(1) |
| C(42) | 4355(3) | 3242(3) | 3612(2) | 33(1) |
| C(43) | 1553(3) | 2882(2) | 3456(2) | 28(1) |
| O11   | 7169(2) | 314(2)  | 1652(2) | 40(1) |
| C21   | 8737(3) | 69(3)   | 754(2)  | 39(1) |
| C31   | 9329(4) | 556(3)  | 1681(3) | 53(1) |
| C41   | 8214(4) | 323(3)  | 2141(3) | 48(1) |
| C11   | 7464(4) | 207(3)  | 799(2)  | 42(1) |

**Table S5.** Anisotropic displacement parameters ( $\text{\AA}^2 \times 10^3$ ) for **1-K**. The anisotropic displacement factor exponent takes the form:  $-2p^2[h^2a^{*2}U^{11} + \dots + 2hka^*b^*U^{12}]$ .

|       | U <sup>11</sup> | U <sup>22</sup> | U <sup>33</sup> | U <sup>23</sup> | U <sup>13</sup> | U <sup>12</sup> |
|-------|-----------------|-----------------|-----------------|-----------------|-----------------|-----------------|
| K(1)  | 25(1)           | 28(1)           | 21(1)           | 10(1)           | 5(1)            | 18(1)           |
| O(1)  | 26(1)           | 23(1)           | 18(1)           | 9(1)            | −2(1)           | 8(1)            |
| Si(1) | 21(1)           | 21(1)           | 20(1)           | 8(1)            | 3(1)            | 11(1)           |
| N(1)  | 23(1)           | 20(1)           | 22(1)           | 10(1)           | 6(1)            | 13(1)           |
| P(1)  | 16(1)           | 17(1)           | 18(1)           | 9(1)            | 5(1)            | 10(1)           |
| S(1)  | 16(1)           | 19(1)           | 16(1)           | 9(1)            | 4(1)            | 8(1)            |
| C(1)  | 14(2)           | 23(2)           | 23(2)           | 12(1)           | 6(1)            | 10(1)           |
| K(2)  | 22(1)           | 29(1)           | 18(1)           | 12(1)           | 6(1)            | 16(1)           |
| O(2)  | 19(1)           | 21(1)           | 22(1)           | 9(1)            | 8(1)            | 12(1)           |
| Si(2) | 21(1)           | 22(1)           | 18(1)           | 10(1)           | 2(1)            | 6(1)            |
| N(2)  | 18(1)           | 22(1)           | 22(1)           | 12(1)           | 5(1)            | 11(1)           |
| P(2)  | 16(1)           | 17(1)           | 17(1)           | 8(1)            | 3(1)            | 9(1)            |
| S(2)  | 15(1)           | 20(1)           | 17(1)           | 9(1)            | 5(1)            | 8(1)            |
| C(2)  | 19(2)           | 17(1)           | 15(1)           | 7(1)            | 2(1)            | 10(1)           |
| C(38) | 20(2)           | 23(2)           | 38(2)           | −1(2)           | 6(2)            | 4(1)            |
| C(13) | 20(2)           | 18(2)           | 25(2)           | 10(1)           | 6(1)            | 9(1)            |
| C(17) | 36(2)           | 41(2)           | 44(2)           | 32(2)           | 11(2)           | 9(2)            |
| C(11) | 25(2)           | 30(2)           | 40(2)           | 22(2)           | 20(2)           | 16(2)           |
| C(15) | 40(2)           | 26(2)           | 30(2)           | 14(2)           | 2(2)            | 5(2)            |
| C(14) | 12(1)           | 26(2)           | 21(2)           | 15(1)           | 3(1)            | 9(1)            |
| C(44) | 47(2)           | 31(2)           | 20(2)           | 11(2)           | 4(2)            | 9(2)            |
| C(16) | 46(2)           | 29(2)           | 46(2)           | 22(2)           | 9(2)            | 4(2)            |
| C(40) | 33(2)           | 37(2)           | 24(2)           | 15(2)           | 1(1)            | 6(2)            |
| C(39) | 26(2)           | 37(2)           | 21(2)           | 1(2)            | 2(1)            | −1(2)           |
| C(3)  | 22(2)           | 20(2)           | 27(2)           | 10(1)           | 6(1)            | 9(1)            |
| O(3)  | 19(1)           | 25(1)           | 21(1)           | 11(1)           | 4(1)            | 12(1)           |
| C(4)  | 23(2)           | 30(2)           | 34(2)           | 11(2)           | 7(1)            | 15(2)           |
| O(4)  | 22(1)           | 28(1)           | 25(1)           | 14(1)           | 11(1)           | 10(1)           |
| C(5)  | 33(2)           | 23(2)           | 28(2)           | 6(1)            | 4(1)            | 18(2)           |
| C(6)  | 33(2)           | 20(2)           | 28(2)           | 11(1)           | 5(1)            | 10(2)           |
| C(7)  | 22(2)           | 22(2)           | 22(2)           | 11(1)           | 5(1)            | 12(1)           |
| C(8)  | 16(2)           | 14(1)           | 26(2)           | 10(1)           | 7(1)            | 9(1)            |
| C(9)  | 22(2)           | 24(2)           | 28(2)           | 14(1)           | 4(1)            | 9(1)            |
| C(10) | 17(2)           | 34(2)           | 45(2)           | 23(2)           | 8(1)            | 11(2)           |

|       |       |       |       |       |       |       |
|-------|-------|-------|-------|-------|-------|-------|
| C(12) | 29(2) | 27(2) | 24(2) | 13(1) | 11(1) | 13(2) |
| C(21) | 44(2) | 26(2) | 27(2) | 5(2)  | −6(2) | 14(2) |
| C(20) | 33(2) | 44(2) | 23(2) | 12(2) | 10(2) | 20(2) |
| C(19) | 41(2) | 26(2) | 26(2) | 14(1) | 6(2)  | 8(2)  |
| C(18) | 53(2) | 37(2) | 23(2) | 18(2) | 9(2)  | 12(2) |
| C(22) | 31(2) | 39(2) | 28(2) | 16(2) | 2(1)  | 19(2) |
| C(32) | 31(2) | 20(2) | 20(2) | 8(1)  | 1(1)  | 9(1)  |
| C(31) | 21(2) | 18(2) | 22(2) | 10(1) | 3(1)  | 9(1)  |
| C(30) | 19(2) | 16(1) | 19(1) | 7(1)  | 1(1)  | 8(1)  |
| C(29) | 30(2) | 23(2) | 26(2) | 11(1) | 2(1)  | 12(2) |
| C(28) | 43(2) | 21(2) | 36(2) | 14(2) | 2(2)  | 10(2) |
| C(27) | 59(3) | 32(2) | 52(2) | 23(2) | 9(2)  | 28(2) |
| C(26) | 47(2) | 51(2) | 67(3) | 33(2) | 17(2) | 37(2) |
| C(25) | 29(2) | 37(2) | 55(2) | 27(2) | 9(2)  | 18(2) |
| C(24) | 25(2) | 21(2) | 23(2) | 9(1)  | 4(1)  | 12(1) |
| C(23) | 14(2) | 23(2) | 19(2) | 6(1)  | 4(1)  | 11(1) |
| C(33) | 26(2) | 22(2) | 26(2) | 10(1) | −6(1) | 6(1)  |
| C(34) | 17(2) | 31(2) | 29(2) | 15(2) | 0(1)  | 7(1)  |
| C(35) | 21(2) | 22(2) | 21(2) | 11(1) | 4(1)  | 8(1)  |
| C(36) | 11(1) | 20(2) | 20(2) | 7(1)  | 4(1)  | 3(1)  |
| C(37) | 20(2) | 26(2) | 31(2) | 10(2) | 4(1)  | 8(1)  |
| C(41) | 24(2) | 25(2) | 22(2) | 11(1) | 2(1)  | 6(1)  |
| C(42) | 32(2) | 40(2) | 31(2) | 20(2) | −1(2) | 13(2) |
| C(43) | 25(2) | 32(2) | 27(2) | 16(2) | 6(1)  | 8(2)  |
| O11   | 34(1) | 58(2) | 42(1) | 29(1) | 10(1) | 25(1) |
| C21   | 29(2) | 34(2) | 52(2) | 16(2) | 9(2)  | 10(2) |
| C31   | 33(2) | 59(3) | 54(3) | 13(2) | −1(2) | 17(2) |
| C41   | 35(2) | 62(3) | 49(2) | 27(2) | −5(2) | 15(2) |
| C11   | 37(2) | 52(2) | 41(2) | 22(2) | 11(2) | 21(2) |

### 2.3. Crystal Structure Determination of **1-Li**

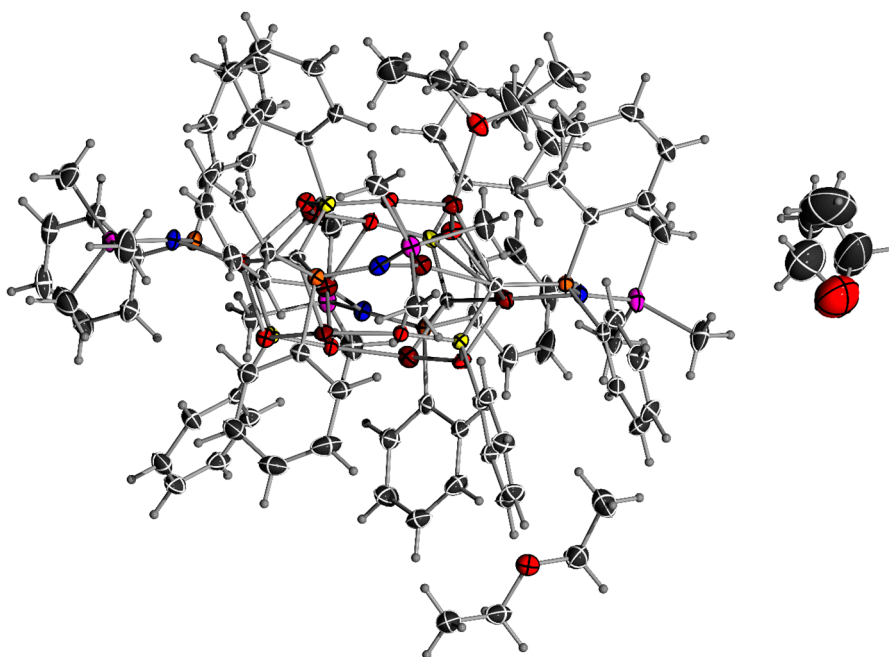

**Figure S13.** ORTEP Plot of **1-Li**. Ellipsoids are drawn at the 50% probability level.

**Table S6.** Atomic coordinates ( $\times 10^4$ ) and equivalent isotropic displacement parameters ( $\text{\AA}^2 \times 10^3$ ) of **1-Li2**. U(eq) is defined as one third of the trace of the orthogonalized  $U_{ij}$  tensor.

|       | <i>x</i> | <i>y</i> | <i>z</i> | U(eq) |
|-------|----------|----------|----------|-------|
| S(1)  | 2909(1)  | 3838(1)  | 2835(1)  | 15(1) |
| P(1)  | 2270(1)  | 2808(1)  | 1893(1)  | 16(1) |
| Si(1) | 3131(1)  | 2199(1)  | 1446(1)  | 20(1) |
| O(1)  | 2773(1)  | 4472(1)  | 3110(1)  | 18(1) |
| N(1)  | 2754(1)  | 2806(1)  | 1648(1)  | 16(1) |
| Li(1) | 1891(2)  | 4266(3)  | 2817(3)  | 22(1) |
| C(1)  | 2296(1)  | 3498(2)  | 2357(1)  | 15(1) |
| C(52) | 2925(1)  | 8458(2)  | 2142(2)  | 16(1) |
| P(2)  | 3941(1)  | 5097(1)  | 1417(1)  | 16(1) |
| Si(2) | 4145(1)  | 6551(1)  | 1018(1)  | 21(1) |
| O(2)  | 3353(1)  | 4036(1)  | 2611(1)  | 18(1) |
| N(2)  | 3926(1)  | 5929(1)  | 1373(1)  | 17(1) |
| Li(2) | 1845(2)  | 4342(3)  | 1694(3)  | 21(1) |
| C(2)  | 1536(1)  | 2898(2)  | 1246(2)  | 18(1) |
| S(2)  | 2670(1)  | 4968(1)  | 1069(1)  | 14(1) |
| C(53) | 2588(2)  | 9069(2)  | 1922(2)  | 20(1) |
| S(3)  | 3359(1)  | 6472(1)  | 2734(1)  | 14(1) |
| P(3)  | 2556(1)  | 7630(1)  | 2141(1)  | 15(1) |
| Si(3) | 2240(1)  | 8281(1)  | 3088(1)  | 19(1) |
| O(3)  | 2310(1)  | 4564(1)  | 1304(1)  | 17(1) |
| N(3)  | 2331(1)  | 7638(1)  | 2653(1)  | 18(1) |
| Li(3) | 3015(2)  | 3802(3)  | 1732(3)  | 22(1) |
| C(3)  | 1072(1)  | 3259(2)  | 1286(2)  | 22(1) |
| C(54) | 2857(2)  | 9715(2)  | 1988(2)  | 23(1) |
| Li(4) | 3600(2)  | 4893(3)  | 2409(3)  | 21(1) |
| S(4)  | 1519(1)  | 5596(1)  | 2297(1)  | 14(1) |
| P(4)  | 1550(1)  | 5286(1)  | 3453(1)  | 16(1) |
| Si(4) | 1271(1)  | 3727(1)  | 3604(1)  | 24(1) |
| O(4)  | 2557(1)  | 5741(1)  | 1084(1)  | 16(1) |
| N(4)  | 1502(1)  | 4452(1)  | 3369(1)  | 19(1) |
| C(4)  | 546(2)   | 3389(2)  | 772(2)   | 29(1) |
| C(57) | 3536(2)  | 8514(2)  | 2406(2)  | 20(1) |
| C(56) | 3805(2)  | 9166(2)  | 2472(2)  | 26(1) |
| C(5)  | 466(2)   | 3142(2)  | 207(2)   | 34(1) |
| Li(5) | 3319(2)  | 6236(3)  | 1643(3)  | 20(1) |
| O(5)  | 3590(1)  | 5837(1)  | 2552(1)  | 16(1) |
| C(55) | 3467(2)  | 9766(2)  | 2266(2)  | 28(1) |
| C(6)  | 912(2)   | 2761(2)  | 162(2)   | 34(1) |
| O(6)  | 3104(1)  | 6265(1)  | 3155(1)  | 16(1) |
| Li(6) | 2221(2)  | 6219(3)  | 1553(3)  | 22(1) |
| C(58) | 4018(1)  | 6939(2)  | 3226(2)  | 15(1) |
| C(7)  | 1445(2)  | 2652(2)  | 676(2)   | 26(1) |
| O(7)  | 1840(1)  | 6017(1)  | 2023(1)  | 16(1) |
| Li(7) | 2277(2)  | 6610(3)  | 2821(3)  | 20(1) |
| C(59) | 4026(1)  | 7355(2)  | 3690(2)  | 20(1) |
| C(8)  | 2250(2)  | 1961(2)  | 2238(2)  | 18(1) |
| Li(8) | 2863(2)  | 5400(3)  | 3429(3)  | 22(1) |
| O(8)  | 1443(1)  | 4856(1)  | 2056(1)  | 16(1) |
| C(60) | 4502(2)  | 7801(2)  | 3999(2)  | 25(1) |



|       |         |         |         |       |
|-------|---------|---------|---------|-------|
| C(9)  | 1745(2) | 1550(2) | 2042(2) | 29(1) |
| O(9)  | 3503(1) | 5280(1) | 4295(1) | 29(1) |
| O(10) | −710(1) | 4246(1) | 613(1)  | 30(1) |
| C(10) | 1762(2) | 907(2)  | 2319(2) | 38(1) |
| C(61) | 4962(2) | 7828(2) | 3839(2) | 25(1) |
| C(11) | 2273(2) | 674(2)  | 2789(2) | 37(1) |
| C(62) | 4953(2) | 7406(2) | 3381(2) | 25(1) |
| C(12) | 2781(2) | 1072(2) | 2994(2) | 32(1) |
| C(45) | 2953(1) | 6904(2) | 2122(1) | 14(1) |
| C(13) | 2768(2) | 1717(2) | 2718(2) | 26(1) |
| C(46) | 1929(1) | 7663(2) | 1377(2) | 18(1) |
| C(14) | 3345(2) | 3315(2) | 3491(2) | 18(1) |
| C(51) | 2015(2) | 7658(2) | 852(2)  | 25(1) |
| C(15) | 3056(2) | 2952(2) | 3767(2) | 26(1) |
| C(50) | 1547(2) | 7765(2) | 280(2)  | 38(1) |
| C(16) | 3381(2) | 2593(2) | 4310(2) | 36(1) |
| C(49) | 985(2)  | 7880(2) | 225(2)  | 41(1) |
| C(17) | 3990(2) | 2604(2) | 4568(2) | 42(1) |
| C(48) | 891(2)  | 7875(2) | 737(2)  | 40(1) |
| C(18) | 4278(2) | 2954(2) | 4284(2) | 34(1) |
| C(47) | 1357(2) | 7764(2) | 1311(2) | 26(1) |
| C(19) | 3957(2) | 3310(2) | 3739(2) | 26(1) |
| C(20) | 3315(2) | 2602(2) | 855(2)  | 27(1) |
| C(21) | 2716(2) | 1362(2) | 1127(2) | 30(1) |
| C(22) | 3843(2) | 1954(2) | 2114(2) | 32(1) |
| C(23) | 3340(1) | 4695(2) | 1426(1) | 15(1) |
| C(24) | 4156(2) | 4706(2) | 866(2)  | 19(1) |
| C(25) | 3738(2) | 4432(2) | 322(2)  | 27(1) |
| C(26) | 3896(2) | 4194(2) | −122(2) | 33(1) |
| C(27) | 4480(2) | 4225(2) | −15(2)  | 34(1) |
| C(28) | 4902(2) | 4487(2) | 528(2)  | 30(1) |
| C(29) | 4747(2) | 4724(2) | 972(2)  | 24(1) |
| C(30) | 4528(1) | 4806(2) | 2151(2) | 18(1) |
| C(31) | 4563(2) | 4107(2) | 2344(2) | 26(1) |
| C(32) | 4977(2) | 3899(2) | 2923(2) | 32(1) |
| C(33) | 5362(2) | 4384(2) | 3320(2) | 33(1) |
| C(34) | 5344(2) | 5077(2) | 3140(2) | 30(1) |
| C(35) | 4930(1) | 5287(2) | 2560(2) | 23(1) |
| C(36) | 2322(1) | 4760(2) | 275(2)  | 16(1) |
| C(38) | 1947(2) | 3867(2) | −501(2) | 26(1) |
| C(37) | 2161(1) | 4061(2) | 105(2)  | 22(1) |
| C(39) | 1884(2) | 4362(2) | −937(2) | 31(1) |
| C(40) | 2039(2) | 5053(2) | −768(2) | 32(1) |
| C(41) | 2260(2) | 5259(2) | −162(2) | 23(1) |
| C(70) | −228(2) | 5692(2) | 2722(2) | 30(1) |
| C(69) | 315(2)  | 5367(2) | 2883(2) | 23(1) |
| C(68) | 839(1)  | 5673(2) | 3307(2) | 19(1) |
| C(67) | 1846(1) | 5705(2) | 3030(2) | 14(1) |
| C(44) | 3888(2) | 7416(2) | 1163(2) | 42(1) |
| C(43) | 4969(2) | 6616(2) | 1326(2) | 42(1) |
| C(42) | 3843(2) | 6422(2) | 180(2)  | 54(1) |
| C(74) | 2011(1) | 5561(2) | 4244(2) | 18(1) |
| C(73) | 804(2)  | 6319(2) | 3568(2) | 25(1) |

|        |         |          |          |         |
|--------|---------|----------|----------|---------|
| C(72)  | 263(2)  | 6644(2)  | 3404(2)  | 30(1)   |
| C(71)  | −251(2) | 6336(2)  | 2982(2)  | 30(1)   |
| C(78)  | 2246(2) | 5458(2)  | 5313(2)  | 27(1)   |
| C(77)  | 2693(2) | 5954(2)  | 5464(2)  | 27(1)   |
| C(76)  | 2788(2) | 6257(2)  | 5004(2)  | 24(1)   |
| C(75)  | 2449(1) | 6066(2)  | 4398(2)  | 19(1)   |
| C(79)  | 1908(2) | 5262(2)  | 4710(2)  | 25(1)   |
| C(80)  | 786(1)  | 5949(2)  | 1921(2)  | 16(1)   |
| C(81)  | 317(1)  | 5567(2)  | 1492(2)  | 22(1)   |
| C(82)  | −243(2) | 5866(2)  | 1225(2)  | 28(1)   |
| C(83)  | −327(2) | 6539(2)  | 1386(2)  | 29(1)   |
| C(85)  | 700(2)  | 6623(2)  | 2086(2)  | 22(1)   |
| C(84)  | 140(2)  | 6922(2)  | 1814(2)  | 26(1)   |
| C(86)  | 584(2)  | 3842(2)  | 3709(2)  | 37(1)   |
| C(87)  | 1116(2) | 3026(2)  | 3013(2)  | 31(1)   |
| C(65)  | 1565(2) | 8833(2)  | 2652(2)  | 27(1)   |
| C(66)  | 2897(2) | 8874(2)  | 3472(2)  | 24(1)   |
| C(64)  | 2130(2) | 7836(2)  | 3712(2)  | 33(1)   |
| C(63)  | 4483(1) | 6958(2)  | 3071(2)  | 22(1)   |
| C(91)  | 3547(3) | 4610(2)  | 4590(2)  | 65(2)   |
| C(90)  | 4044(2) | 5661(2)  | 4490(2)  | 46(1)   |
| C(89)  | 4443(2) | 5368(3)  | 4237(2)  | 70(2)   |
| C(88)  | 1855(2) | 3370(2)  | 4343(2)  | 36(1)   |
| C(93)  | −902(2) | 4741(2)  | −350(2)  | 42(1)   |
| C(96)  | −478(2) | 3865(2)  | 1615(2)  | 49(1)   |
| C(95)  | −810(2) | 3697(2)  | 948(2)   | 37(1)   |
| C(94)  | −996(2) | 4118(2)  | −29(2)   | 35(1)   |
| C(92A) | 3631(3) | 4596(3)  | 5203(3)  | 39(2)   |
| O1A1   | 0(60)   | 5320(40) | 5090(70) | 130(30) |
| C1A1   | 999(8)  | 4493(10) | 5567(10) | 123(8)  |
| C2A1   | 546(9)  | 5038(10) | 5187(9)  | 106(5)  |
| O1B1   | −30(30) | 5150(20) | 5090(30) | 58(12)  |
| C2B1   | 407(9)  | 4668(14) | 5508(12) | 182(12) |
| C1B1   | 923(11) | 5006(11) | 5799(11) | 154(9)  |
| C(92B) | 3186(6) | 4412(7)  | 4746(6)  | 29(4)   |

**Table S7.** Anisotropic displacement parameters ( $\text{\AA}^2 \times 10^3$ ) for **1-Li**. The anisotropic displacement factor exponent takes the form:  $-2p^2[h^2a^*U^{11} + \dots + 2hka^*b^*U^{12}]$ .

|       | $U^{11}$ | $U^{22}$ | $U^{33}$ | $U^{23}$ | $U^{13}$ | $U^{12}$ |
|-------|----------|----------|----------|----------|----------|----------|
| S(1)  | 18(1)    | 13(1)    | 15(1)    | 2(1)     | 8(1)     | 2(1)     |
| P(1)  | 18(1)    | 13(1)    | 18(1)    | 1(1)     | 10(1)    | −1(1)    |
| Si(1) | 25(1)    | 15(1)    | 24(1)    | 2(1)     | 15(1)    | 4(1)     |
| O(1)  | 18(1)    | 12(1)    | 22(1)    | −1(1)    | 6(1)     | 1(1)     |
| N(1)  | 18(2)    | 12(1)    | 21(2)    | 0(1)     | 10(1)    | 0(1)     |
| Li(1) | 25(3)    | 20(3)    | 20(3)    | 1(3)     | 11(3)    | −1(3)    |
| C(1)  | 16(2)    | 17(2)    | 14(2)    | 1(2)     | 9(2)     | 0(1)     |
| C(52) | 20(2)    | 15(2)    | 16(2)    | 0(2)     | 11(2)    | −1(2)    |
| P(2)  | 16(1)    | 15(1)    | 18(1)    | 0(1)     | 10(1)    | 0(1)     |
| Si(2) | 25(1)    | 20(1)    | 21(1)    | 1(1)     | 11(1)    | −6(1)    |
| O(2)  | 16(1)    | 19(1)    | 20(1)    | 3(1)     | 10(1)    | −1(1)    |
| N(2)  | 19(2)    | 14(1)    | 21(2)    | 0(1)     | 12(1)    | −2(1)    |
| Li(2) | 28(3)    | 14(3)    | 21(3)    | 0(3)     | 10(3)    | −1(3)    |

|       |       |       |       |       |       |       |
|-------|-------|-------|-------|-------|-------|-------|
| C(2)  | 20(2) | 15(2) | 20(2) | 2(2)  | 10(2) | −3(2) |
| S(2)  | 15(1) | 13(1) | 14(1) | 0(1)  | 7(1)  | −1(1) |
| C(53) | 26(2) | 15(2) | 21(2) | 3(2)  | 14(2) | 2(2)  |
| S(3)  | 15(1) | 12(1) | 17(1) | −2(1) | 7(1)  | −1(1) |
| P(3)  | 17(1) | 12(1) | 16(1) | 0(1)  | 7(1)  | −1(1) |
| Si(3) | 25(1) | 15(1) | 21(1) | 0(1)  | 13(1) | 2(1)  |
| O(3)  | 15(1) | 21(1) | 18(1) | 3(1)  | 10(1) | 0(1)  |
| N(3)  | 16(2) | 13(1) | 24(2) | −3(1) | 9(1)  | 0(1)  |
| Li(3) | 21(3) | 19(3) | 23(3) | −1(3) | 9(3)  | 1(3)  |
| C(3)  | 19(2) | 29(2) | 20(2) | −5(2) | 9(2)  | −5(2) |
| C(54) | 36(2) | 14(2) | 27(2) | 2(2)  | 20(2) | 4(2)  |
| Li(4) | 21(3) | 22(3) | 17(3) | −1(3) | 6(3)  | 9(3)  |
| S(4)  | 13(1) | 15(1) | 16(1) | 0(1)  | 7(1)  | 0(1)  |
| P(4)  | 17(1) | 17(1) | 16(1) | −1(1) | 9(1)  | −2(1) |
| Si(4) | 31(1) | 21(1) | 26(1) | −1(1) | 18(1) | −5(1) |
| O(4)  | 18(1) | 12(1) | 19(1) | −1(1) | 9(1)  | 1(1)  |
| N(4)  | 21(2) | 22(2) | 18(2) | −2(1) | 14(1) | −5(1) |
| C(4)  | 19(2) | 32(2) | 35(2) | −5(2) | 12(2) | 0(2)  |
| C(57) | 26(2) | 16(2) | 22(2) | 2(2)  | 13(2) | 1(2)  |
| C(56) | 21(2) | 23(2) | 33(2) | −1(2) | 12(2) | −8(2) |
| C(5)  | 19(2) | 47(3) | 30(2) | 0(2)  | 5(2)  | 1(2)  |
| Li(5) | 15(3) | 23(3) | 19(3) | 2(3)  | 6(3)  | 1(2)  |
| O(5)  | 18(1) | 12(1) | 20(1) | −1(1) | 10(1) | 1(1)  |
| C(55) | 39(2) | 15(2) | 38(2) | −3(2) | 23(2) | −9(2) |
| C(6)  | 31(2) | 47(3) | 23(2) | −9(2) | 9(2)  | −1(2) |
| O(6)  | 17(1) | 14(1) | 15(1) | −1(1) | 6(1)  | −2(1) |
| Li(6) | 21(3) | 25(3) | 19(3) | −5(3) | 9(3)  | −9(3) |
| C(58) | 15(2) | 11(2) | 15(2) | 2(2)  | 3(2)  | 0(1)  |
| C(7)  | 23(2) | 33(2) | 25(2) | −2(2) | 13(2) | 4(2)  |
| O(7)  | 16(1) | 17(1) | 18(1) | 0(1)  | 10(1) | −2(1) |
| Li(7) | 21(3) | 17(3) | 23(3) | −1(3) | 10(3) | 0(2)  |
| C(59) | 18(2) | 23(2) | 20(2) | 1(2)  | 11(2) | −3(2) |
| C(8)  | 29(2) | 12(2) | 20(2) | −2(2) | 18(2) | 1(2)  |
| Li(8) | 25(3) | 21(3) | 21(3) | −3(3) | 10(3) | −1(3) |
| O(8)  | 14(1) | 15(1) | 17(1) | −3(1) | 6(1)  | −2(1) |
| C(60) | 26(2) | 24(2) | 21(2) | −6(2) | 6(2)  | −5(2) |
| C(9)  | 32(2) | 21(2) | 42(3) | 6(2)  | 23(2) | 2(2)  |
| O(9)  | 38(2) | 24(1) | 24(2) | 5(1)  | 14(1) | 4(1)  |
| O(10) | 27(1) | 35(2) | 25(2) | 0(1)  | 10(1) | −2(1) |
| C(10) | 43(3) | 21(2) | 68(3) | 6(2)  | 40(3) | 0(2)  |
| C(61) | 16(2) | 25(2) | 31(2) | 0(2)  | 7(2)  | −4(2) |
| C(11) | 63(3) | 18(2) | 49(3) | 9(2)  | 44(3) | 8(2)  |
| C(62) | 16(2) | 25(2) | 33(2) | 1(2)  | 12(2) | 1(2)  |
| C(12) | 52(3) | 26(2) | 23(2) | 3(2)  | 21(2) | 9(2)  |
| C(45) | 15(2) | 14(2) | 12(2) | −3(1) | 5(2)  | −2(1) |
| C(13) | 41(2) | 20(2) | 20(2) | −1(2) | 18(2) | 2(2)  |
| C(46) | 22(2) | 9(2)  | 19(2) | 1(2)  | 7(2)  | −1(1) |
| C(14) | 26(2) | 13(2) | 13(2) | 0(2)  | 8(2)  | 5(2)  |
| C(51) | 26(2) | 23(2) | 24(2) | 2(2)  | 9(2)  | −4(2) |
| C(15) | 36(2) | 19(2) | 22(2) | 3(2)  | 14(2) | 4(2)  |
| C(50) | 39(3) | 46(3) | 22(2) | 5(2)  | 9(2)  | −6(2) |
| C(16) | 57(3) | 26(2) | 25(2) | 8(2)  | 19(2) | 5(2)  |
| C(49) | 33(2) | 49(3) | 26(2) | 1(2)  | 0(2)  | 0(2)  |

|       |       |       |       |       |       |        |
|-------|-------|-------|-------|-------|-------|--------|
| C(17) | 56(3) | 32(2) | 24(2) | 7(2)  | 7(2)  | 15(2)  |
| C(48) | 22(2) | 48(3) | 40(3) | −7(2) | 4(2)  | 3(2)   |
| C(18) | 33(2) | 34(2) | 23(2) | 3(2)  | 2(2)  | 15(2)  |
| C(47) | 21(2) | 30(2) | 24(2) | −4(2) | 6(2)  | −2(2)  |
| C(19) | 28(2) | 24(2) | 22(2) | 1(2)  | 7(2)  | 9(2)   |
| C(20) | 33(2) | 24(2) | 35(2) | 2(2)  | 24(2) | 6(2)   |
| C(21) | 43(2) | 17(2) | 37(2) | −3(2) | 25(2) | 2(2)   |
| C(22) | 33(2) | 36(2) | 35(2) | 4(2)  | 21(2) | 6(2)   |
| C(23) | 16(2) | 14(2) | 13(2) | 3(2)  | 6(2)  | 3(1)   |
| C(24) | 26(2) | 13(2) | 26(2) | 4(2)  | 18(2) | 1(2)   |
| C(25) | 27(2) | 26(2) | 31(2) | −2(2) | 17(2) | 0(2)   |
| C(26) | 51(3) | 27(2) | 26(2) | −4(2) | 23(2) | −1(2)  |
| C(27) | 55(3) | 20(2) | 46(3) | 3(2)  | 41(2) | 5(2)   |
| C(28) | 39(2) | 19(2) | 48(3) | 6(2)  | 34(2) | 5(2)   |
| C(29) | 28(2) | 18(2) | 34(2) | 2(2)  | 19(2) | 2(2)   |
| C(30) | 12(2) | 21(2) | 25(2) | 2(2)  | 11(2) | 4(2)   |
| C(31) | 16(2) | 26(2) | 34(2) | 5(2)  | 10(2) | 3(2)   |
| C(32) | 24(2) | 30(2) | 42(3) | 17(2) | 15(2) | 8(2)   |
| C(33) | 25(2) | 43(3) | 26(2) | 10(2) | 8(2)  | 11(2)  |
| C(34) | 21(2) | 36(2) | 23(2) | −7(2) | 2(2)  | 5(2)   |
| C(35) | 19(2) | 24(2) | 28(2) | −1(2) | 11(2) | 4(2)   |
| C(36) | 11(2) | 20(2) | 18(2) | −1(2) | 7(2)  | −1(1)  |
| C(38) | 21(2) | 28(2) | 25(2) | −9(2) | 7(2)  | −3(2)  |
| C(37) | 21(2) | 21(2) | 22(2) | 0(2)  | 8(2)  | 1(2)   |
| C(39) | 27(2) | 47(3) | 18(2) | −8(2) | 9(2)  | −2(2)  |
| C(40) | 37(2) | 36(2) | 21(2) | 6(2)  | 11(2) | −1(2)  |
| C(41) | 32(2) | 21(2) | 17(2) | 2(2)  | 11(2) | −1(2)  |
| C(70) | 17(2) | 40(2) | 31(2) | −2(2) | 9(2)  | −4(2)  |
| C(69) | 25(2) | 25(2) | 22(2) | −1(2) | 13(2) | −5(2)  |
| C(68) | 19(2) | 25(2) | 17(2) | 1(2)  | 12(2) | −2(2)  |
| C(67) | 14(2) | 14(2) | 16(2) | −3(2) | 7(2)  | −2(1)  |
| C(44) | 52(3) | 27(2) | 57(3) | 14(2) | 34(2) | 4(2)   |
| C(43) | 34(2) | 41(3) | 53(3) | 7(2)  | 22(2) | −11(2) |
| C(42) | 71(3) | 58(3) | 32(3) | 2(2)  | 22(2) | −27(3) |
| C(74) | 19(2) | 18(2) | 19(2) | 0(2)  | 10(2) | 4(2)   |
| C(73) | 24(2) | 26(2) | 23(2) | −6(2) | 10(2) | −3(2)  |
| C(72) | 34(2) | 30(2) | 32(2) | −5(2) | 20(2) | 3(2)   |
| C(71) | 19(2) | 40(2) | 35(2) | 1(2)  | 16(2) | 5(2)   |
| C(78) | 36(2) | 29(2) | 21(2) | 1(2)  | 17(2) | 2(2)   |
| C(77) | 28(2) | 31(2) | 17(2) | −6(2) | 5(2)  | 4(2)   |
| C(76) | 22(2) | 23(2) | 22(2) | −7(2) | 6(2)  | −3(2)  |
| C(75) | 21(2) | 16(2) | 20(2) | −1(2) | 10(2) | 3(2)   |
| C(79) | 26(2) | 26(2) | 22(2) | 1(2)  | 12(2) | −2(2)  |
| C(80) | 14(2) | 21(2) | 12(2) | 4(2)  | 5(2)  | 5(2)   |
| C(81) | 19(2) | 29(2) | 19(2) | −3(2) | 9(2)  | 0(2)   |
| C(82) | 17(2) | 42(2) | 21(2) | −6(2) | 5(2)  | −2(2)  |
| C(83) | 20(2) | 39(2) | 27(2) | 4(2)  | 8(2)  | 11(2)  |
| C(85) | 18(2) | 23(2) | 24(2) | 2(2)  | 10(2) | 2(2)   |
| C(84) | 24(2) | 27(2) | 27(2) | −1(2) | 11(2) | 6(2)   |
| C(86) | 45(3) | 30(2) | 51(3) | −1(2) | 33(2) | −13(2) |
| C(87) | 39(2) | 26(2) | 35(2) | −7(2) | 24(2) | −13(2) |
| C(65) | 28(2) | 25(2) | 29(2) | −5(2) | 13(2) | 3(2)   |
| C(66) | 30(2) | 18(2) | 22(2) | −2(2) | 9(2)  | 3(2)   |

|        |         |         |         |         |        |        |
|--------|---------|---------|---------|---------|--------|--------|
| C(64)  | 53(3)   | 20(2)   | 39(3)   | −1(2)   | 32(2)  | 1(2)   |
| C(63)  | 18(2)   | 19(2)   | 29(2)   | −6(2)   | 11(2)  | −2(2)  |
| C(91)  | 139(5)  | 31(3)   | 52(3)   | 22(2)   | 65(4)  | 31(3)  |
| C(90)  | 40(3)   | 55(3)   | 28(3)   | 4(2)    | 3(2)   | −1(2)  |
| C(89)  | 35(3)   | 114(5)  | 58(3)   | 25(3)   | 17(3)  | 19(3)  |
| C(88)  | 53(3)   | 30(2)   | 29(2)   | 7(2)    | 23(2)  | −1(2)  |
| C(93)  | 27(2)   | 64(3)   | 31(3)   | 1(2)    | 11(2)  | −4(2)  |
| C(96)  | 55(3)   | 61(3)   | 35(3)   | 6(2)    | 25(2)  | 2(2)   |
| C(95)  | 30(2)   | 41(2)   | 39(3)   | 7(2)    | 16(2)  | 1(2)   |
| C(94)  | 22(2)   | 45(3)   | 30(2)   | −5(2)   | 6(2)   | 3(2)   |
| C(92A) | 60(5)   | 28(3)   | 28(4)   | 4(3)    | 20(4)  | 8(3)   |
| O1A1   | 90(30)  | 160(70) | 140(40) | 40(60)  | 40(30) | 10(60) |
| C1A1   | 74(11)  | 180(20) | 133(17) | 82(17)  | 64(11) | 25(14) |
| C2A1   | 83(14)  | 125(15) | 113(14) | 0(12)   | 46(13) | 5(12)  |
| O1B1   | 50(20)  | 30(30)  | 80(30)  | 20(20)  | 26(18) | 0(20)  |
| C2B1   | 68(13)  | 310(30) | 160(20) | 120(20) | 51(16) | 30(18) |
| C1B1   | 109(17) | 160(20) | 140(20) | 56(18)  | 12(15) | 25(17) |
| C(92B) | 33(8)   | 30(7)   | 28(9)   | 4(6)    | 19(7)  | 4(6)   |

---
